# Supplementary material
Source: PubMed Central journal article supplement (PMC1523184)
Supplement: 7601215s1.pdf [file 7601215s1.pdf]

Supplementary Table 1. Candidate cancer causing genes identified in wild type and *Blm*<sup>m3</sup>-deficient tumors

| AKXD strain | Tumor No. | Geno  | CIS gene                     | Protein Classification/Function    | Chr | Location           | Distance               | Orientation |
|-------------|-----------|-------|------------------------------|------------------------------------|-----|--------------------|------------------------|-------------|
| AKXD-27     | 8146      | +/+   | <i>Ncoa2</i>                 | Nuclear receptor coactivator       | 1   | 3 prime            | 15.37kb                | inv         |
| AKXD-10     | 11400     | ko/ko | <i>Ncoa2</i>                 | Nuclear receptor coactivator       | 1   | 3 prime            | 15.347kb               | same        |
| AKXD-27     | 8751      | ko/ko | <i>Ncoa2</i>                 | Nuclear receptor coactivator       | 1   | 3 prime            | 14.414kb               | inv         |
| AKXD-27     | 8635      | ko/ko | <i>Wnt6</i>                  | Secreted growth factor             | 1   | 5 prime            | 1.757kb                | inv         |
| AKXD-27     | 6645      | +/+   | <i>Wnt6</i>                  | Secreted growth factor             | 1   | 3 prime            | 7.511kb                | same        |
| AKXD-14     | 4301      | ko/ko | <i>Wnt6</i>                  | Secreted growth factor             | 1   | 3 prime            | 9.556kb                | inv         |
| AKXD-10     | 14038     | +/+   | <i>Ptma</i>                  | prothymosin-alpha                  | 1   | 5 prime            | 38.599kb               | same        |
| AKXD-27     | 6664      | +/+   | <i>Ptma</i>                  | prothymosin-alpha                  | 1   | 5 prime            | 26.143kb               | same        |
| AKXD-14     | 3046      | ko/ko | <i>Pigr</i>                  | Immunoglobulin receptor            | 1   | 3 prime            | 10.482kb               | same        |
| AKXD-14     | 3390      | +/+   | <i>Pigr</i>                  | Immunoglobulin receptor            | 1   | 3 prime            | 10.611kb               | same        |
| AKXD-27     | 7415      | ko/ko | <i>Zfp281</i>                | Zinc finger protein                | 1   | 3 prime            | 55.805 kb              | inv         |
| AKXD-10     | 14503     | ko/ko | <i>Zfp281</i>                | Zinc finger protein                | 1   | 3 prime            | 56.061 kb              | same        |
| AKXD-10     | 12182     | +/+   | <i>Sdccag8</i>               | Colon cancer antigen               | 1   | 5 prime            | 0.137kb                | inv         |
| AKXD-14     | 3275      | ko/ko | <i>Sdccag8</i>               | Colon cancer antigen               | 1   | intron 1           | disrupt CDS            | same        |
| AKXD-10     | 11746     | ko/ko | <i>BC031781</i>              | Undefined                          | 1   | 5 prime            | 2.129kb                | inv         |
| AKXD-27     | 7065      | +/+   | <i>BC031781</i>              | Undefined                          | 1   | intron 1           | disrupt CDS            | inv         |
| AKXD-27     | 7242      | +/+   | <i>Crry   Cr2</i>            | Complement receptor                | 1   | intron 1   3 prime | disrupt CDS   8.929kb  | inv   inv   |
| AKXD-14     | 3275      | ko/ko | <i>Crry   Cr2</i>            | Complement receptor                | 1   | intron 1   3 prime | disrupt CDS   8.734kb  | same   same |
| AKXD-10     | 11419     | +/+   | <i>Il2ra</i>                 | Cytokine receptor                  | 2   | 5 prime            | 0.93kb                 | inv         |
| AKXD-27     | 8145      | ko/ko | <i>Il2ra</i>                 | Cytokine receptor                  | 2   | 5 prime            | 0.106kb                | same        |
| AKXD-27     | 7101      | +/+   | <i>Il2ra</i>                 | Cytokine receptor                  | 2   | intron 1           | disrupt CDS            | same        |
| AKXD-14     | 3304      | +/+   | <i>Notch1</i>                | Transcription factor               | 2   | exon 34            | disrupt CDS            | same        |
| AKXD-27     | 7065      | +/+   | <i>Notch1</i>                | Transcription factor               | 2   | exon 34            | disrupt CDS            | same        |
| AKXD-27     | 8751      | ko/ko | <i>Notch1</i>                | Transcription factor               | 2   | exon 34            | disrupt CDS            | same        |
| AKXD-27     | 7239      | +/+   | <i>Notch1</i>                | Transcription factor               | 2   | 5 prime            | 9.939kb                | same        |
| AKXD-27     | 8352      | ko/ko | <i>Cstad</i>                 | mitochondrial protein              | 2   | 3 prime            | 47.61kb                | inv         |
| AKXD-10     | 13835     | +/+   | <i>Cstad</i>                 | mitochondrial protein              | 2   | 3 prime            | 49.2kb                 | same        |
| AKXD-27     | 7412      | ko/ko | <i>Cstad</i>                 | mitochondrial protein              | 2   | 3 prime            | 83.547kb               | same        |
| AKXD-10     | 11582     | ko/ko | <i>Fnbp1</i>                 | Protein binding protein            | 2   | intron 6           | disrupt CDS            | inv         |
| AKXD-27     | 7230      | ko/ko | <i>Fnbp1</i>                 | Protein binding protein            | 2   | intron 1           | disrupt CDS            | inv         |
| AKXD-14     | 3127      | +/+   | <i>Fnbp1</i>                 | Protein binding protein            | 2   | intron 1           | disrupt CDS            | inv         |
| AKXD-10     | 14043     | ko/ko | <i>Traf1</i>                 | Tnf receptor-associated protein    | 2   | intron 2           | not disrupt CDS        | inv         |
| AKXD-27     | 7102      | ko/ko | <i>Traf1</i>                 | Tnf receptor-associated protein    | 2   | intron 2           | not disrupt CDS        | same        |
| AKXD-27     | 7412      | ko/ko | <i>Traf1</i>                 | Tnf receptor-associated protein    | 2   | intron 1           | not disrupt CDS        | inv         |
| AKXD-10     | 13847     | ko/ko | <i>Crb2</i>                  | Undefined                          | 2   | 5 prime            | 19.328kb               | inv         |
| AKXD-14     | 4299      | ko/ko | <i>Crb2</i>                  | Undefined                          | 2   | 5 prime            | 18.511kb               | same        |
| AKXD-27     | 7244      | ko/ko | <i>Crb2</i>                  | Undefined                          | 2   | 5 prime            | 17.333kb               | same        |
| AKXD-27     | 7232      | ko/ko | <i>Crb2</i>                  | Undefined                          | 2   | 5 prime            | 17.295kb               | same        |
| AKXD-27     | 7380      | ko/ko | <i>Hnrpa3</i>                | RNA binding                        | 2   | 5 prime            | 1.197kb                | inv         |
| AKXD-10     | 13738     | ko/ko | <i>Hnrpa3</i>                | RNA binding                        | 2   | 5 prime            | 0.929kb                | inv         |
| AKXD-27     | 6965      | ko/ko | <i>Slc43a1</i>               | Solute carrier protein             | 2   | intron 1           | disrupt CDS            | same        |
| AKXD-27     | 6645      | +/+   | <i>Slc43a1</i>               | Solute carrier protein             | 2   | 3 prime            | 5.591kb                | same        |
| AKXD-27     | 7232      | ko/ko | <i>Sfp1</i>                  | Transcription factor               | 2   | 5 prime            | 18.398kb               | inv         |
| AKXD-10     | 11680     | ko/ko | <i>Sfp1</i>                  | Transcription factor               | 2   | 5 prime            | 15.343kb               | inv         |
| AKXD-27     | 7389      | ko/ko | <i>Sfp1</i>                  | Transcription factor               | 2   | 5 prime            | 13.934kb               | inv         |
| AKXD-27     | 7107      | ko/ko | <i>Lmo2</i>                  | LIM domain protein                 | 2   | 5 prime            | 68.389kb               | inv         |
| AKXD-27     | 7105      | ko/ko | <i>Lmo2</i>                  | LIM domain protein                 | 2   | 5 prime            | 68.048kb               | inv         |
| AKXD-14     | 3095      | +/+   | <i>Lmo2</i>                  | LIM domain protein                 | 2   | 5 prime            | 36.352kb               | inv         |
| AKXD-27     | 6664      | +/+   | <i>Rasgrp1</i>               | Ras GRP                            | 2   | intron 1           | disrupt CDS            | inv         |
| AKXD-27     | 8888      | +/+   | <i>Rasgrp1</i>               | Ras GRP                            | 2   | intron 1           | disrupt CDS            | inv         |
| AKXD-27     | 7338      | ko/ko | <i>Rasgrp1</i>               | Ras GRP                            | 2   | 5 prime            | 9.157kb                | inv         |
| AKXD-14     | 3276      | +/+   | <i>Rasgrp1</i>               | Ras GRP                            | 2   | 5 prime            | 56.339kb               | inv         |
| AKXD-14     | 3359      | ko/ko | <i>Rasgrp1</i>               | Ras GRP                            | 2   | 5 prime            | 61.685kb               | inv         |
| AKXD-14     | 3203      | +/+   | <i>Rasgrp1</i>               | Ras GRP                            | 2   | 5 prime            | 77.487kb               | inv         |
| AKXD-10     | 13743     | ko/ko | <i>Gabpb1</i>                | Transcription factor               | 2   | intron 1           | not disrupt CDS        | same        |
| AKXD-14     | 3162      | ko/ko | <i>Gabpb1</i>                | Transcription factor               | 2   | intron 1           | not disrupt CDS        | same        |
| AKXD-27     | 8635      | ko/ko | <i>Bcl2l</i>                 | Anti-apoptosis                     | 2   | intron 1           | not disrupt CDS        | same        |
| AKXD-10     | 11766     | +/+   | <i>Bcl2l</i>                 | Anti-apoptosis                     | 2   | intron 1           | not disrupt CDS        | inv         |
| AKXD-27     | 7425      | ko/ko | <i>Hck</i>                   | Kinase                             | 2   | 5 prime            | 42.01kb                | inv         |
| AKXD-27     | 8751      | ko/ko | <i>Hck</i>                   | Kinase                             | 2   | 5 prime            | 22.898kb               | inv         |
| AKXD-14     | 3196      | +/+   | <i>Hck</i>                   | Kinase                             | 2   | 5 prime            | 16.151kb               | inv         |
| AKXD-14     | 3037      | ko/ko | <i>Rnpc2   6820402O20Rik</i> | coactivator   transcription factor | 2   | 5 prime   5 prime  | 9.766kb   6.827kb      | inv   same  |
| AKXD-27     | 8558      | +/+   | <i>Rnpc2   6820402O20Rik</i> | coactivator   transcription factor | 2   | 5 prime   5 prime  | 9.983kb   6.61kb       | same   inv  |
| AKXD-10     | 11427     | ko/ko | <i>Rnpc2   6820402O20Rik</i> | coactivator   transcription factor | 2   | 5 prime   intron 1 | 17.292kb   disrupt CDS | inv   same  |
| AKXD-14     | 4295      | ko/ko | <i>Rbl1</i>                  | Cell cycle regulator               | 2   | intron 1           | disrupt CDS            | inv         |
| AKXD-10     | 11680     | ko/ko | <i>Rbl1</i>                  | Cell cycle regulator               | 2   | intron 1           | disrupt CDS            | same        |
| AKXD-10     | 12171     | +/+   | <i>Ppp1r16b</i>              | Protein phosphatase inhibitor      | 2   | intron 1           | not disrupt CDS        | inv         |
| AKXD-10     | 14038     | +/+   | <i>Ppp1r16b</i>              | Protein phosphatase inhibitor      | 2   | intron 2           | not disrupt CDS        | same        |
| AKXD-10     | 12175     | ko/ko | <i>Ppp1r16b</i>              | Protein phosphatase inhibitor      | 2   | intron 2           | not disrupt CDS        | inv         |
| AKXD-27     | 7103      | +/+   | <i>Ppp1r16b</i>              | Protein phosphatase inhibitor      | 2   | intron 3           | disrupt CDS            | inv         |
| AKXD-27     | 6996      | +/+   | <i>Cebpb1   Ptpn1</i>        | Transcription factor   Phosphatase | 2   | 3 prime   5 prime  | 109.23kb   132.723kb   | same   same |
| AKXD-14     | 3361      | +/+   | <i>Cebpb1   Ptpn1</i>        | Transcription factor   Phosphatase | 2   | 3 prime   5 prime  | 114.999kb   126.954kb  | same   same |
| AKXD-27     | 7379      | ko/ko | <i>Cebpb1   Ptpn1</i>        | Transcription factor   Phosphatase | 2   | 3 prime   5 prime  | 141.68kb   100.273kb   | same   same |
| AKXD-10     | 11580     | +/+   | <i>Atp9a</i>                 | ATPase                             | 2   | 5 prime            | 1.877kb                | inv         |
| AKXD-14     | 3302      | ko/ko | <i>Atp9a</i>                 | ATPase                             | 2   | 5 prime            | 1.877kb                | inv         |
| AKXD-10     | 11770     | ko/ko | <i>Zfp217</i>                | Zinc finger protein                | 2   | 5 prime            | 7.41kb                 | same        |
| AKXD-10     | 11976     | ko/ko | <i>Zfp217</i>                | Zinc finger protein                | 2   | 5 prime            | 12.502kb               | same        |
| AKXD-27     | 8138      | ko/ko | <i>Tmepai</i>                | Protein binding protein            | 2   | 5 prime            | 129.414kb              | inv         |
| AKXD-27     | 6686      | +/+   | <i>Tmepai</i>                | Protein binding protein            | 2   | 5 prime            | 132.082kb              | same        |
| AKXD-14     | 4153      | +/+   | <i>Rgs19</i>                 | Signaling protein                  | 2   | intron 1           | not disrupt CDS        | same        |
| AKXD-27     | 7221      | ko/ko | <i>Rgs19</i>                 | Signaling protein                  | 2   | intron 1           | not disrupt CDS        | same        |
| AKXD-27     | 7376      | ko/ko | <i>Evi1</i>                  | Transcription factor               | 3   | 5 prime            | 12.506kb               | same        |
| AKXD-27     | 8408      | ko/ko | <i>Evi1</i>                  | Transcription factor               | 3   | 5 prime            | 13.445kb               | same        |
| AKXD-14     | 3390      | +/+   | <i>3110045G13Rik</i>         | Undefined                          | 3   | intron 1           | not disrupt CDS        | inv         |

|         |       |       |                      |                                |   |           |                 |      |
|---------|-------|-------|----------------------|--------------------------------|---|-----------|-----------------|------|
| AKXD-14 | 3196  | +/+   | <b>3110045G13Rik</b> | Undefined                      | 3 | 5 prime   | 17.404kb        | inv  |
| AKXD-27 | 8498  | ko/ko | <b>Shc1</b>          | Intracellular signalling       | 3 | intron 1  | not disrupt CDS | same |
| AKXD-27 | 7069  | ko/ko | <b>Shc1</b>          | Intracellular signalling       | 3 | 3 prime   | 6.285kb         | same |
| AKXD-27 | 6634  | ko/ko | <b>Rfx5</b>          | DNA binding                    | 3 | 5 prime   | 1.791kb         | same |
| AKXD-27 | 8145  | ko/ko | <b>Rfx5</b>          | DNA binding                    | 3 | 5 prime   | 1.573kb         | inv  |
| AKXD-10 | 12182 | +/+   | <b>Rfx5</b>          | DNA binding                    | 3 | 5 prime   | 0.241 kb        | same |
| AKXD-14 | 3376  | +/+   | <b>Rfx5</b>          | DNA binding                    | 3 | exon 1    | disrupt CDS     | same |
| AKXD-14 | 4302  | +/+   | <b>Notch2</b>        | Transcription factor           | 3 | 5 prime   | 80.316kb        | inv  |
| AKXD-27 | 7424  | ko/ko | <b>Notch2</b>        | Transcription factor           | 3 | 5 prime   | 51.805kb        | same |
| AKXD-10 | 11824 | ko/ko | <b>Notch2</b>        | Transcription factor           | 3 | 5 prime   | 41.094kb        | inv  |
| AKXD-10 | 12186 | +/+   | <b>Notch2</b>        | Transcription factor           | 3 | 5 prime   | 39.221kb        | inv  |
| AKXD-27 | 6911  | +/+   | <b>Notch2</b>        | Transcription factor           | 3 | 5 prime   | 33.905kb        | inv  |
| AKXD-10 | 13844 | ko/ko | <b>Notch2</b>        | Transcription factor           | 3 | 5 prime   | 33.688kb        | inv  |
| AKXD-10 | 11979 | ko/ko | <b>Notch2</b>        | Transcription factor           | 3 | 5 prime   | 33.684kb        | inv  |
| AKXD-10 | 11976 | ko/ko | <b>Notch2</b>        | Transcription factor           | 3 | 5 prime   | 31.568kb        | inv  |
| AKXD-10 | 11825 | +/+   | <b>Notch2</b>        | Transcription factor           | 3 | 5 prime   | 20.675kb        | inv  |
| AKXD-14 | 3031  | ko/ko | <b>Notch2</b>        | Transcription factor           | 3 | 5 prime   | 18.607kb        | inv  |
| AKXD-10 | 11668 | ko/ko | <b>Notch2</b>        | Transcription factor           | 3 | 5 prime   | 0.62kb          | inv  |
| AKXD-14 | 3361  | +/+   | <b>Psm5</b>          | Hydrolase, protein degradation | 3 | intron 1  | disrupt CDS     | inv  |
| AKXD-10 | 11814 | +/+   | <b>Psm5</b>          | Hydrolase, protein degradation | 3 | intron 1  | disrupt CDS     | inv  |
| AKXD-27 | 7242  | +/+   | <b>Nfkb1</b>         | Transcriptional repressor      | 3 | intron 14 | disrupt CDS     | same |
| AKXD-14 | 3020  | +/+   | <b>Nfkb1</b>         | Transcriptional repressor      | 3 | 5 prime   | 0.144kb         | same |
| AKXD-10 | 14043 | ko/ko | <b>Nfkb1</b>         | Transcriptional repressor      | 3 | 5 prime   | 0.87kb          | inv  |
| AKXD-27 | 6648  | ko/ko | <b>Nfkb1</b>         | Transcriptional repressor      | 3 | 5 prime   | 0.91kb          | inv  |
| AKXD-10 | 11664 | ko/ko | <b>Nfkb1</b>         | Transcriptional repressor      | 3 | 5 prime   | 1.227kb         | inv  |
| AKXD-14 | 3055  | +/+   | <b>Rg9mtd2</b>       | Methyltransferase domain       | 3 | intron 1  | not disrupt CDS | same |
| AKXD-10 | 13746 | +/+   | <b>Rg9mtd2</b>       | Methyltransferase domain       | 3 | intron 1  | not disrupt CDS | same |
| AKXD-27 | 6634  | ko/ko | <b>Bach2</b>         | Transcriptional regulation     | 4 | 5 prime   | 14.141kb        | inv  |
| AKXD-10 | 11977 | +/+   | <b>Bach2</b>         | Transcriptional regulation     | 4 | 5 prime   | 10.379 kb       | same |
| AKXD-10 | 12180 | +/+   | <b>Bach2</b>         | Transcriptional regulation     | 4 | intron 2  | not disrupt CDS | inv  |
| AKXD-27 | 8160  | +/+   | <b>Bach2</b>         | Transcriptional regulation     | 4 | intron 2  | not disrupt CDS | inv  |
| AKXD-10 | 11680 | ko/ko | <b>Bach2</b>         | Transcriptional regulation     | 4 | intron 2  | not disrupt CDS | inv  |
| AKXD-27 | 7092  | ko/ko | <b>Bach2</b>         | Transcriptional regulation     | 4 | intron 2  | not disrupt CDS | inv  |
| AKXD-27 | 7415  | ko/ko | <b>Bach2</b>         | Transcriptional regulation     | 4 | intron 3  | not disrupt CDS | inv  |
| AKXD-27 | 8610  | ko/ko | <b>Fancg</b>         | Fanconi Anemia group G         | 4 | exon 4    | disrupt CDS     | inv  |
| AKXD-14 | 4301  | ko/ko | <b>Fancg</b>         | Fanconi Anemia group G         | 4 | intron 2  | disrupt CDS     | same |
| AKXD-27 | 7405  | +/+   | <b>Pax5</b>          | Transcription factor           | 4 | 5 prime   | 1.108kb         | same |
| AKXD-10 | 11591 | ko/ko | <b>Pax5</b>          | Transcription factor           | 4 | 5 prime   | 3.685kb         | same |
| AKXD-27 | 8634  | ko/ko | <b>Anp32b</b>        | Nuclear phosphoprotein         | 4 | intron 1  | disrupt CDS     | inv  |
| AKXD-10 | 11976 | ko/ko | <b>Anp32b</b>        | Nuclear phosphoprotein         | 4 | intron 1  | disrupt CDS     | same |
| AKXD-27 | 6896  | +/+   | <b>Coro2a</b>        | Actin binding protein          | 4 | intron 3  | disrupt CDS     | same |
| AKXD-14 | 3285  | ko/ko | <b>Coro2a</b>        | Actin binding protein          | 4 | 5 prime   | 16.159kb        | inv  |
| AKXD-10 | 11824 | ko/ko | <b>Jak1</b>          | Kinase                         | 4 | 5 prime   | 27.329kb        | inv  |
| AKXD-27 | 8161  | +/+   | <b>Jak1</b>          | Kinase                         | 4 | 5 prime   | 32.878kb        | inv  |
| AKXD-27 | 7415  | ko/ko | <b>Ppap2b</b>        | Phosphatase                    | 4 | 3 prime   | 19.865kb        | inv  |
| AKXD-27 | 7251  | +/+   | <b>Ppap2b</b>        | Phosphatase                    | 4 | 3 prime   | 53.818 kb       | inv  |
| AKXD-27 | 6648  | ko/ko | <b>Ppap2b</b>        | Phosphatase                    | 4 | 3 prime   | 55.054kb        | same |
| AKXD-27 | 8442  | ko/ko | <b>Usp24</b>         | Ubiquitin protease             | 4 | 5 prime   | 2.501kb         | inv  |
| AKXD-27 | 7232  | ko/ko | <b>Usp24</b>         | Ubiquitin protease             | 4 | intron 1  | disrupt CDS     | same |
| AKXD-10 | 13847 | ko/ko | <b>Cdkn2c</b>        | Cdk4 inhibitor                 | 4 | intron 1  | disrupt CDS     | inv  |
| AKXD-27 | 7221  | ko/ko | <b>Cdkn2c</b>        | Cdk4 inhibitor                 | 4 | intron 1  | disrupt CDS     | inv  |
| AKXD-14 | 3041  | ko/ko | <b>Hivep3</b>        | HIV enhancer binding protein   | 4 | intron 1  | not disrupt CDS | inv  |
| AKXD-27 | 7221  | ko/ko | <b>Hivep3</b>        | HIV enhancer binding protein   | 4 | intron 1  | not disrupt CDS | inv  |
| AKXD-27 | 7213  | ko/ko | <b>Hivep3</b>        | HIV enhancer binding protein   | 4 | intron 2  | not disrupt CDS | same |
| AKXD-14 | 3290  | ko/ko | <b>Laptn5</b>        | Lysosome membrane protein      | 4 | 5 prime   | 4.53kb          | same |
| AKXD-27 | 7099  | ko/ko | <b>Laptn5</b>        | Lysosome membrane protein      | 4 | 5 prime   | 0.364kb         | same |
| AKXD-27 | 7107  | ko/ko | <b>Laptn5</b>        | Lysosome membrane protein      | 4 | intron 1  | disrupt CDS     | inv  |
| AKXD-27 | 7425  | ko/ko | <b>Arid1a</b>        | Chromatin remodeling           | 4 | 5 prime   | 34.017kb        | same |
| AKXD-10 | 11976 | ko/ko | <b>Arid1a</b>        | Chromatin remodeling           | 4 | 5 prime   | 34.38kb         | inv  |
| AKXD-10 | 11395 | ko/ko | <b>Arid1a</b>        | Chromatin remodeling           | 4 | 5 prime   | 51.779 kb       | inv  |
| AKXD-27 | 7221  | ko/ko | <b>Cd52</b>          | Membrane protein               | 4 | 5 prime   | 2.542kb         | inv  |
| AKXD-14 | 3110  | ko/ko | <b>Cd52</b>          | Membrane protein               | 4 | 5 prime   | 4.804kb         | same |
| AKXD-27 | 6661  | +/+   | <b>Cd52</b>          | Membrane protein               | 4 | 5 prime   | 6.803kb         | same |
| AKXD-10 | 11673 | ko/ko | <b>D4Wsu53e</b>      | Undefined                      | 4 | 5 prime   | 3.498kb         | inv  |
| AKXD-14 | 4149  | ko/ko | <b>D4Wsu53e</b>      | Undefined                      | 4 | exon 1    | not disrupt CDS | inv  |
| AKXD-27 | 8751  | ko/ko | <b>Runx3</b>         | Transcription factor           | 4 | 5 prime   | 72.418kb        | inv  |
| AKXD-14 | 3132  | +/+   | <b>Runx3</b>         | Transcription factor           | 4 | 5 prime   | 49.401kb        | inv  |
| AKXD-14 | 3132  | +/+   | <b>Cnr2</b>          | Cell receptor                  | 4 | 5 prime   | 20.664kb        | inv  |
| AKXD-14 | 3276  | +/+   | <b>Cnr2</b>          | Cell receptor                  | 4 | 5 prime   | 19.19kb         | inv  |
| AKXD-27 | 7232  | ko/ko | <b>Cnr2</b>          | Cell receptor                  | 4 | 5 prime   | 19.14kb         | same |
| AKXD-10 | 11819 | ko/ko | <b>Cnr2</b>          | Cell receptor                  | 4 | 5 prime   | 18.417kb        | inv  |
| AKXD-14 | 3166  | ko/ko | <b>Cnr2</b>          | Cell receptor                  | 4 | intron 1  | not disrupt CDS | inv  |
| AKXD-27 | 8559  | +/+   | <b>Dhrs3</b>         | Oxidoreductase                 | 4 | exon 1    | not disrupt CDS | same |
| AKXD-14 | 3108  | ko/ko | <b>Dhrs3</b>         | Oxidoreductase                 | 4 | intron 1  | disrupt CDS     | same |
| AKXD-27 | 7389  | ko/ko | <b>Tnfrsf8</b>       | Tnf receptor superfamily       | 4 | 5 prime   | 0.419kb         | inv  |
| AKXD-14 | 3387  | ko/ko | <b>Tnfrsf8</b>       | Tnf receptor superfamily       | 4 | 5 prime   | 0.617kb         | inv  |
| AKXD-27 | 7107  | ko/ko | <b>Dnb5</b>          | Sugar transporter              | 4 | 3 prime   | 60.488kb        | inv  |
| AKXD-10 | 11395 | ko/ko | <b>Dnb5</b>          | Sugar transporter              | 4 | 3 prime   | 57.355kb        | inv  |
| AKXD-27 | 8913  | ko/ko | <b>Prdm16</b>        | Transcription factor           | 4 | intron 2  | disrupt CDS     | inv  |
| AKXD-14 | 4313  | ko/ko | <b>Prdm16</b>        | Transcription factor           | 4 | intron 2  | disrupt CDS     | same |
| AKXD-27 | 7107  | ko/ko | <b>Prdm16</b>        | Transcription factor           | 4 | intron 1  | disrupt CDS     | same |
| AKXD-27 | 7105  | ko/ko | <b>Prdm16</b>        | Transcription factor           | 4 | intron 1  | disrupt CDS     | same |
| AKXD-14 | 3285  | ko/ko | <b>Tnfrsf14</b>      | Tnf receptor superfamily       | 4 | intron 1  | disrupt CDS     | inv  |
| AKXD-10 | 11819 | ko/ko | <b>Tnfrsf14</b>      | Tnf receptor superfamily       | 4 | 5 prime   | 0.219kb         | inv  |
| AKXD-27 | 7069  | ko/ko | <b>Cdk6</b>          | Kinase                         | 5 | 5 prime   | 2.747kb         | same |
| AKXD-27 | 6661  | +/+   | <b>Cdk6</b>          | Kinase                         | 5 | 5 prime   | 2.305kb         | inv  |
| AKXD-27 | 8637  | ko/ko | <b>Srpk2</b>         | Kinase                         | 5 | 5 prime   | 33.519kb        | inv  |

|         |       |       |                               |                             |   |                    |                           |             |
|---------|-------|-------|-------------------------------|-----------------------------|---|--------------------|---------------------------|-------------|
| AKXD-14 | 3367  | +/+   | <b>Srpk2</b>                  | Kinase                      | 5 | 5 prime            | 35.233kb                  | inv         |
| AKXD-27 | 8751  | ko/ko | <b>Centd1</b>                 | Undefined                   | 5 | intron 1           | not disrupt CDS           | same        |
| AKXD-14 | 3134  | ko/ko | <b>Centd1</b>                 | Undefined                   | 5 | 5 prime            | 0.538kb                   | inv         |
| AKXD-10 | 11680 | ko/ko | <b>Klf3</b>                   | Transcriptional regulation  | 5 | 5 prime            | 1.202kb                   | inv         |
| AKXD-14 | 3128  | +/+   | <b>Klf3</b>                   | Transcriptional regulation  | 5 | 5 prime            | 1.202kb                   | inv         |
| AKXD-27 | 8574  | +/+   | <b>Kdr</b>                    | Cell receptor               | 5 | 3 prime            | 107.928kb                 | inv         |
| AKXD-27 | 6992  | +/+   | <b>Kdr</b>                    | Cell receptor               | 5 | 3 prime            | 107.928kb                 | inv         |
| AKXD-27 | 6895  | ko/ko | <b>Kdr</b>                    | Cell receptor               | 5 | 3 prime            | 107.921kb                 | inv         |
| AKXD-14 | 4153  | +/+   | <b>Gfi1</b>                   | Transcription factor        | 5 | intron 5           | disrupt CDS               | same        |
| AKXD-10 | 11825 | +/+   | <b>Gfi1</b>                   | Transcription factor        | 5 | 5 prime            | 0.059kb                   | inv         |
| AKXD-14 | 4149  | ko/ko | <b>Gfi1</b>                   | Transcription factor        | 5 | 5 prime            | 0.224kb                   | same        |
| AKXD-14 | 3116  | ko/ko | <b>Gfi1</b>                   | Transcription factor        | 5 | 5 prime            | 0.334kb                   | inv         |
| AKXD-27 | 7099  | ko/ko | <b>Gfi1</b>                   | Transcription factor        | 5 | 5 prime            | 0.451kb                   | inv         |
| AKXD-27 | 7242  | +/+   | <b>Gfi1</b>                   | Transcription factor        | 5 | 5 prime            | 0.807kb                   | inv         |
| AKXD-10 | 11766 | +/+   | <b>Gfi1</b>                   | Transcription factor        | 5 | 5 prime            | 1.041kb                   | same        |
| AKXD-14 | 3381  | ko/ko | <b>Gfi1</b>                   | Transcription factor        | 5 | 5 prime            | 1.041kb                   | same        |
| AKXD-27 | 6895  | ko/ko | <b>Gfi1</b>                   | Transcription factor        | 5 | 5 prime            | 1.617kb                   | inv         |
| AKXD-14 | 3110  | ko/ko | <b>Gfi1</b>                   | Transcription factor        | 5 | 5 prime            | 1.945kb                   | inv         |
| AKXD-14 | 3296  | ko/ko | <b>Gfi1</b>                   | Transcription factor        | 5 | 5 prime            | 2.004kb                   | inv         |
| AKXD-10 | 11398 | +/+   | <b>Gfi1</b>                   | Transcription factor        | 5 | 5 prime            | 2.009kb                   | inv         |
| AKXD-14 | 3280  | ko/ko | <b>Gfi1</b>                   | Transcription factor        | 5 | 5 prime            | 3.258kb                   | inv         |
| AKXD-27 | 8559  | +/+   | <b>Gfi1</b>                   | Transcription factor        | 5 | 5 prime            | 7.049kb                   | inv         |
| AKXD-27 | 7422  | ko/ko | <b>Gfi1</b>                   | Transcription factor        | 5 | 5 prime            | 7.866kb                   | inv         |
| AKXD-14 | 3053  | +/+   | <b>Gfi1</b>                   | Transcription factor        | 5 | 5 prime            | 14kb                      | inv         |
| AKXD-27 | 6899  | ko/ko | <b>Gfi1</b>                   | Transcription factor        | 5 | 5 prime            | 15.268kb                  | inv         |
| AKXD-14 | 3390  | +/+   | <b>Gfi1</b>                   | Transcription factor        | 5 | 5 prime            | 25.098kb                  | inv         |
| AKXD-27 | 7213  | ko/ko | <b>Gfi1</b>                   | Transcription factor        | 5 | 5 prime            | 30.781kb                  | inv         |
| AKXD-27 | 7103  | +/+   | <b>Gfi1</b>                   | Transcription factor        | 5 | 5 prime            | 49.027kb                  | inv         |
| AKXD-27 | 8637  | ko/ko | <b>Prkab1</b>                 | Kinase                      | 5 | intron 1           | disrupt CDS               | same        |
| AKXD-27 | 8888  | +/+   | <b>Prkab1</b>                 | Kinase                      | 5 | 5 prime            | 0.744kb                   | inv         |
| AKXD-14 | 3100  | +/+   | <b>Ppp1cc   9130017A15Rik</b> | Phosphatase   Phosphatase   | 5 | 3 prime   5 prime  | 33.429kb   75.443kb       | inv   inv   |
| AKXD-14 | 3277  | +/+   | <b>Ppp1cc   9130017A15Rik</b> | Phosphatase   Phosphatase   | 5 | 3 prime   5 prime  | 34.002kb   74.87kb        | same   same |
| AKXD-14 | 3302  | ko/ko | <b>BC065090 (Fbx110)</b>      | Jumonji domain, F-box       | 5 | intron 3           | disrupt CDS               | same        |
| AKXD-14 | 3275  | ko/ko | <b>BC065090 (Fbx110)</b>      | Jumonji domain, F-box       | 5 | intron 2           | disrupt CDS               | same        |
| AKXD-27 | 7422  | ko/ko | <b>BC065090 (Fbx110)</b>      | Jumonji domain, F-box       | 5 | exon 1             | not disrupt CDS           | same        |
| AKXD-14 | 3037  | ko/ko | <b>Sbds</b>                   | Undefined                   | 5 | 5 prime            | 0.855kb                   | same        |
| AKXD-27 | 7420  | +/+   | <b>Sbds</b>                   | Undefined                   | 5 | 5 prime            | 1.017kb                   | same        |
| AKXD-10 | 11411 | ko/ko | <b>Aps</b>                    | Signalling, adaptor protein | 5 | 3 prime            | 3.426kb                   | same        |
| AKXD-27 | 7102  | ko/ko | <b>Aps</b>                    | Signalling, adaptor protein | 5 | intron 1           | not disrupt CDS           | same        |
| AKXD-10 | 11977 | +/+   | <b>Lfng</b>                   | Signalling, notch regulator | 5 | 5 prime            | 9.454kb                   | inv         |
| AKXD-10 | 14106 | +/+   | <b>Lfng</b>                   | Signalling, notch regulator | 5 | 5 prime            | 1.448kb                   | inv         |
| AKXD-10 | 14150 | ko/ko | <b>Lfng</b>                   | Signalling, notch regulator | 5 | 5 prime            | 0.619kb                   | inv         |
| AKXD-10 | 12186 | +/+   | <b>Lfng</b>                   | Signalling, notch regulator | 5 | 5 prime            | 0.572kb                   | inv         |
| AKXD-14 | 3290  | ko/ko | <b>Lfng</b>                   | Signalling, notch regulator | 5 | 3 prime            | 2.7kb                     | same        |
| AKXD-10 | 12002 | ko/ko | <b>AA881470  lqce</b>         | Undefined  Undefined        | 5 | 5 prime   5 prime  | 0.94kb   1.704kb          | same   inv  |
| AKXD-14 | 3046  | ko/ko | <b>AA881470  lqce</b>         | Undefined  Undefined        | 5 | intron 1   5 prime | not disrupt CDS   3.336kb | inv   same  |
| AKXD-27 | 8560  | ko/ko | <b>Actb</b>                   | Actin cytoskeleton          | 5 | 3 prime            | 7.688kb                   | inv         |
| AKXD-10 | 11664 | ko/ko | <b>Actb</b>                   | Actin cytoskeleton          | 5 | 5 prime            | 1.859kb                   | same        |
| AKXD-27 | 6648  | ko/ko | <b>Actb</b>                   | Actin cytoskeleton          | 5 | 5 prime            | 22.692kb                  | inv         |
| AKXD-14 | 3106  | +/+   | <b>Flt3</b>                   | Kinase                      | 5 | intron 20          | disrupt CDS               | inv         |
| AKXD-14 | 3381  | ko/ko | <b>Flt3</b>                   | Kinase                      | 5 | intron 20          | disrupt CDS               | inv         |
| AKXD-14 | 3302  | ko/ko | <b>Ubl3</b>                   | Ubiquitin-like protein      | 5 | exon 1             | not disrupt CDS           | same        |
| AKXD-10 | 11423 | ko/ko | <b>Ubl3</b>                   | Ubiquitin-like protein      | 5 | 5 prime            | 2.948kb                   | same        |
| AKXD-27 | 7389  | ko/ko | <b>Ubl3</b>                   | Ubiquitin-like protein      | 5 | 5 prime            | 46.431 kb                 | same        |
| AKXD-27 | 7420  | +/+   | <b>Phf14</b>                  | Transcriptional regulation  | 6 | 5 prime            | 0.389kb                   | inv         |
| AKXD-27 | 8916  | ko/ko | <b>Phf14</b>                  | Transcriptional regulation  | 6 | 5 prime            | 0.389kb                   | inv         |
| AKXD-10 | 13738 | ko/ko | <b>AB041803</b>               | Undefined                   | 6 | 3 prime            | 77.422kb                  | same        |
| AKXD-14 | 3197  | ko/ko | <b>AB041803</b>               | Undefined                   | 6 | 3 prime            | 76.545kb                  | inv         |
| AKXD-10 | 11402 | +/+   | <b>Jmjd1a</b>                 | Jumonji domain              | 6 | 5 prime            | 12.092kb                  | inv         |
| AKXD-10 | 11395 | ko/ko | <b>Jmjd1a</b>                 | Jumonji domain              | 6 | 5 prime            | 12.314kb                  | inv         |
| AKXD-14 | 3283  | ko/ko | <b>Vamp8</b>                  | Endosome protein            | 6 | 3 prime            | 3.673kb                   | inv         |
| AKXD-27 | 6625  | ko/ko | <b>Vamp8</b>                  | Endosome protein            | 6 | exon 1             | disrupt CDS               | same        |
| AKXD-14 | 3100  | +/+   | <b>Irak2</b>                  | Kinase                      | 6 | intron 4           | disrupt CDS               | same        |
| AKXD-27 | 7422  | ko/ko | <b>Irak2</b>                  | Kinase                      | 6 | 3 prime            | 1.467kb                   | same        |
| AKXD-27 | 6641  | ko/ko | <b>Zfp239</b>                 | Zinc finger protein         | 6 | 3 prime            | 6.369kb                   | same        |
| AKXD-14 | 4151  | ko/ko | <b>Zfp239</b>                 | Zinc finger protein         | 6 | 3 prime            | 22.128kb                  | inv         |
| AKXD-10 | 11746 | ko/ko | <b>Zfp239</b>                 | Zinc finger protein         | 6 | 3 prime            | 32.569kb                  | same        |
| AKXD-27 | 8309  | ko/ko | <b>Cecr5</b>                  | Hydrolase                   | 6 | 5 prime            | 86.131kb                  | inv         |
| AKXD-14 | 3387  | ko/ko | <b>Cecr5</b>                  | Hydrolase                   | 6 | 5 prime            | 112.032kb                 | inv         |
| AKXD-10 | 12002 | ko/ko | <b>Bid</b>                    | Apoptosis regulator         | 6 | intron 1           | not disrupt CDS           | inv         |
| AKXD-27 | 8146  | +/+   | <b>Bid</b>                    | Apoptosis regulator         | 6 | 5 prime            | 16.876kb                  | same        |
| AKXD-27 | 8172  | +/+   | <b>Hcph</b>                   | Phosphatase                 | 6 | intron 3           | disrupt CDS               | inv         |
| AKXD-27 | 7102  | ko/ko | <b>Hcph</b>                   | Phosphatase                 | 6 | intron 2           | disrupt CDS               | inv         |
| AKXD-27 | 7379  | ko/ko | <b>2810406C15Rik</b>          | Chromosome condensation     | 6 | intron 21          | disrupt CDS               | inv         |
| AKXD-27 | 6686  | +/+   | <b>2810406C15Rik</b>          | Chromosome condensation     | 6 | intron 1           | not disrupt CDS           | inv         |
| AKXD-10 | 11556 | +/+   | <b>Ltbr</b>                   | Cytokine receptor           | 6 | 5 prime            | 0.329kb                   | inv         |
| AKXD-10 | 14443 | +/+   | <b>Ltbr</b>                   | Cytokine receptor           | 6 | 5 prime            | 0.344kb                   | inv         |
| AKXD-27 | 7379  | ko/ko | <b>Ltbr</b>                   | Cytokine receptor           | 6 | 5 prime            | 7.206kb                   | inv         |
| AKXD-10 | 11767 | +/+   | <b>Tnfrsf1a</b>               | Tnf receptor superfamily    | 6 | 5 prime            | 5.764kb                   | same        |
| AKXD-10 | 11977 | +/+   | <b>Tnfrsf1a</b>               | Tnf receptor superfamily    | 6 | exon 8             | disrupt CDS               | inv         |
| AKXD-27 | 7424  | ko/ko | <b>Ccnd2</b>                  | Cell cycle regulation       | 6 | 5 prime            | 0.395kb                   | inv         |
| AKXD-14 | 3132  | +/+   | <b>Ccnd2</b>                  | Cell cycle regulation       | 6 | 5 prime            | 1.075kb                   | inv         |
| AKXD-27 | 8559  | +/+   | <b>Ccnd2</b>                  | Cell cycle regulation       | 6 | 5 prime            | 2.027kb                   | inv         |
| AKXD-27 | 7233  | +/+   | <b>Ccnd2</b>                  | Cell cycle regulation       | 6 | 5 prime            | 2.089kb                   | inv         |
| AKXD-27 | 6992  | +/+   | <b>Ccnd2</b>                  | Cell cycle regulation       | 6 | 5 prime            | 2.151kb                   | inv         |
| AKXD-27 | 8161  | +/+   | <b>Ccnd2</b>                  | Cell cycle regulation       | 6 | 5 prime            | 2.151kb                   | inv         |
| AKXD-14 | 3098  | ko/ko | <b>Ccnd2</b>                  | Cell cycle regulation       | 6 | 5 prime            | 29.998kb                  | same        |

|         |       |       |                       |                                 |    |                   |                            |             |
|---------|-------|-------|-----------------------|---------------------------------|----|-------------------|----------------------------|-------------|
| AKXD-14 | 3302  | ko/ko | <b>D130058E03</b>     | Undefined                       | 6  | 5 prime           | 22.523kb                   | inv         |
| AKXD-14 | 3296  | ko/ko | <b>D130058E03</b>     | Undefined                       | 6  | 5 prime           | 22.956kb                   | inv         |
| AKXD-10 | 13743 | ko/ko | <b>A630024B12Rik</b>  | Sugar binding protein           | 6  | 5 prime           | 9.612kb                    | inv         |
| AKXD-14 | 5039  | ko/ko | <b>A630024B12Rik</b>  | Sugar binding protein           | 6  | 5 prime           | 6.49kb                     | same        |
| AKXD-10 | 11984 | ko/ko | <b>5730419I09Rik</b>  | Undefined                       | 6  | 5 prime           | 44.88 kb                   | same        |
| AKXD-27 | 7371  | ko/ko | <b>5730419I09Rik</b>  | Undefined                       | 6  | 5 prime           | 67.862 kb                  | same        |
| AKXD-27 | 8758  | ko/ko | <b>Napa</b>           | Protein transporter             | 7  | 5 prime           | 53.207kb                   | inv         |
| AKXD-27 | 7420  | +/+   | <b>Napa</b>           | Protein transporter             | 7  | 5 prime           | 43.53kb                    | inv         |
| AKXD-10 | 11427 | ko/ko | <b>Pou2f2</b>         | Transcription factor            | 7  | exon 3            | disrupt CDS                | same        |
| AKXD-27 | 7105  | ko/ko | <b>Pou2f2</b>         | Transcription factor            | 7  | intron 1          | disrupt CDS                | inv         |
| AKXD-27 | 6641  | ko/ko | <b>Pou2f2</b>         | Transcription factor            | 7  | intron 1          | disrupt CDS                | same        |
| AKXD-27 | 6634  | ko/ko | <b>Pou2f2</b>         | Transcription factor            | 7  | intron 1          | disrupt CDS                | inv         |
| AKXD-10 | 13739 | ko/ko | <b>Plekhg2  Zfp36</b> | Common site/zinc finger protein | 7  | 5 prime   5 prime | 8.099kb   1.448kb          | same   same |
| AKXD-10 | 12171 | +/+   | <b>Plekhg2  Zfp36</b> | Common site/zinc finger protein | 7  | 5 prime   5 prime | 9.089kb   2.438kb          | inv   inv   |
| AKXD-10 | 11580 | +/+   | <b>Plekhg2  Zfp36</b> | Common site/zinc finger protein | 7  | 5 prime   5 prime | 9.491kb   2.84kb           | inv   inv   |
| AKXD-14 | 3046  | ko/ko | <b>1810054O13Rik</b>  | Undefined                       | 7  | intron 1          | disrupt CDS                | inv         |
| AKXD-10 | 14503 | ko/ko | <b>1810054O13Rik</b>  | Undefined                       | 7  | intron 2          | disrupt CDS                | inv         |
| AKXD-14 | 3304  | +/+   | <b>Chd2</b>           | DNA binding protein             | 7  | 5 prime           | 16.848kb                   | inv         |
| AKXD-10 | 11395 | ko/ko | <b>Chd2</b>           | DNA binding protein             | 7  | 5 prime           | 18.371kb                   | same        |
| AKXD-14 | 3100  | +/+   | <b>Chd2</b>           | DNA binding protein             | 7  | 5 prime           | 55.064kb                   | inv         |
| AKXD-10 | 13835 | +/+   | <b>Chd2</b>           | DNA binding protein             | 7  | 5 prime           | 55.193kb                   | inv         |
| AKXD-27 | 7065  | +/+   | <b>Akap13</b>         | Kinase anchor protein           | 7  | 5 prime           | 27.274kb                   | inv         |
| AKXD-27 | 8756  | ko/ko | <b>Akap13</b>         | Kinase anchor protein           | 7  | 5 prime           | 24.388kb                   | same        |
| AKXD-10 | 11567 | ko/ko | <b>Il16</b>           | Cytokine                        | 7  | intron 15         | disrupt CDS                | inv         |
| AKXD-14 | 3197  | ko/ko | <b>Il16</b>           | Cytokine                        | 7  | intron 15         | disrupt CDS                | inv         |
| AKXD-27 | 7105  | ko/ko | <b>Me3</b>            | Mitochondrial protein           | 7  | intron 7          | disrupt CDS                | inv         |
| AKXD-10 | 12223 | +/+   | <b>Me3</b>            | Mitochondrial protein           | 7  | intron 12         | disrupt CDS                | inv         |
| AKXD-10 | 11411 | ko/ko | <b>LOC209380</b>      | Undefined                       | 7  | 5 prime           | 88.696kb                   | same        |
| AKXD-10 | 11980 | ko/ko | <b>LOC209380</b>      | Undefined                       | 7  | 5 prime           | 89.922kb                   | same        |
| AKXD-10 | 11679 | ko/ko | <b>Rras2</b>          | Ras protein                     | 7  | 5 prime           | 77.406kb                   | inv         |
| AKXD-27 | 6686  | +/+   | <b>Rras2</b>          | Ras protein                     | 7  | 5 prime           | 107.102kb                  | same        |
| AKXD-14 | 3197  | ko/ko | <b>Rras2</b>          | Ras protein                     | 7  | 5 prime           | 108.835kb                  | inv         |
| AKXD-14 | 3203  | +/+   | <b>Rras2</b>          | Ras protein                     | 7  | 5 prime           | 110.748kb                  | inv         |
| AKXD-10 | 11401 | ko/ko | <b>Rras2</b>          | Ras protein                     | 7  | 5 prime           | 112.29kb                   | inv         |
| AKXD-27 | 8760  | +/+   | <b>Rras2</b>          | Ras protein                     | 7  | 5 prime           | 113.004kb                  | inv         |
| AKXD-27 | 6965  | ko/ko | <b>Jmjd5</b>          | Jumonji domain                  | 7  | intron 1          | not disrupt CDS            | inv         |
| AKXD-10 | 12218 | ko/ko | <b>Jmjd5</b>          | Jumonji domain                  | 7  | intron 1          | not disrupt CDS            | inv         |
| AKXD-14 | 5046  | ko/ko | <b>Coro1a</b>         | Actin binding protein           | 7  | exon 4            | disrupt CDS                | inv         |
| AKXD-10 | 11582 | ko/ko | <b>Coro1a</b>         | Actin binding protein           | 7  | intron 1          | not disrupt CDS            | inv         |
| AKXD-10 | 12182 | +/+   | <b>Stx4a</b>          | Protein transporter             | 7  | 5 prime           | 0.608kb                    | same        |
| AKXD-10 | 11977 | +/+   | <b>Stx4a</b>          | Protein transporter             | 7  | 5 prime           | 0.304kb                    | same        |
| AKXD-14 | 5039  | ko/ko | <b>BC023151</b>       | Undefined                       | 7  | 5 prime           | 0.328 kb                   | same        |
| AKXD-14 | 3390  | +/+   | <b>BC023151</b>       | Undefined                       | 7  | intron 2          | disrupt CDS                | inv         |
| AKXD-27 | 7405  | +/+   | <b>Hras</b>           | Ras protein                     | 7  | 3 prime           | 21.187kb                   | same        |
| AKXD-27 | 8635  | ko/ko | <b>Hras</b>           | Ras protein                     | 7  | 3 prime           | 20.345kb                   | same        |
| AKXD-27 | 7371  | ko/ko | <b>Ccnd1</b>          | Cell cycle regulation           | 7  | exon 5            | not disrupt CDS            | same        |
| AKXD-10 | 14443 | +/+   | <b>Ccnd1</b>          | Cell cycle regulation           | 7  | exon 5            | not disrupt CDS            | same        |
| AKXD-27 | 8498  | ko/ko | <b>Ccnd1</b>          | Cell cycle regulation           | 7  | 5 prime           | 1.175kb                    | same        |
| AKXD-14 | 3276  | +/+   | <b>Ccnd1</b>          | Cell cycle regulation           | 7  | 5 prime           | 1.51kb                     | inv         |
| AKXD-10 | 11558 | ko/ko | <b>Mef2b</b>          | Transcription enhancer factor   | 8  | 5 prime           | 0.981kb                    | inv         |
| AKXD-10 | 11985 | ko/ko | <b>Mef2b</b>          | Transcription enhancer factor   | 8  | intron 1          | not disrupt CDS            | inv         |
| AKXD-10 | 12210 | ko/ko | <b>Mef2b</b>          | Transcription enhancer factor   | 8  | intron 1          | not disrupt CDS            | inv         |
| AKXD-10 | 14100 | ko/ko | <b>Ssbp4</b>          | DNA binding protein             | 8  | intron 1          | disrupt CDS                | same        |
| AKXD-27 | 8445  | +/+   | <b>Ssbp4</b>          | DNA binding protein             | 8  | intron 1          | disrupt CDS                | same        |
| AKXD-27 | 8138  | ko/ko | <b>Ssbp4</b>          | DNA binding protein             | 8  | 5 prime           | 3.675kb                    | inv         |
| AKXD-27 | 8763  | +/+   | <b>Lyl1</b>           | Transcriptional regulation      | 8  | intron 3          | disrupt CDS                | same        |
| AKXD-14 | 3275  | ko/ko | <b>Lyl1</b>           | Transcriptional regulation      | 8  | intron 3          | disrupt CDS                | same        |
| AKXD-27 | 6995  | +/+   | <b>Junb</b>           | Transcription factor            | 8  | 3 prime           | 1.692kb                    | same        |
| AKXD-10 | 12169 | ko/ko | <b>Junb</b>           | Transcription factor            | 8  | 5 prime           | 10.276kb                   | inv         |
| AKXD-27 | 8442  | ko/ko | <b>Zfp423</b>         | Transcription factor            | 8  | exon 1            | disrupt CDS                | inv         |
| AKXD-27 | 7403  | +/+   | <b>Zfp423</b>         | Transcription factor            | 8  | 5 prime           | 0.395kb                    | inv         |
| AKXD-27 | 6895  | ko/ko | <b>Zfp423</b>         | Transcription factor            | 8  | 5 prime           | 0.508kb                    | same        |
| AKXD-27 | 7338  | ko/ko | <b>Rbl2</b>           | Cell cycle regulation           | 8  | intron 4          | disrupt CDS                | inv         |
| AKXD-10 | 13739 | ko/ko | <b>Rbl2</b>           | Cell cycle regulation           | 8  | intron 5          | disrupt CDS                | inv         |
| AKXD-14 | 3055  | +/+   | <b>Nfatc3</b>         | Transcription factor            | 8  | 5 prime           | 5.314kb                    | same        |
| AKXD-27 | 7221  | ko/ko | <b>Nfatc3</b>         | Transcription factor            | 8  | intron 1          | disrupt CDS                | same        |
| AKXD-27 | 6896  | +/+   | <b>Icam1</b>          | Cell adhesion                   | 9  | 5 prime           | 21.764kb                   | inv         |
| AKXD-10 | 11985 | ko/ko | <b>Icam1</b>          | Cell adhesion                   | 9  | intron 1          | disrupt CDS                | same        |
| AKXD-27 | 7380  | ko/ko | <b>Pde4a</b>          | Phosphodiesterase               | 9  | intron 1          | disrupt CDS                | inv         |
| AKXD-27 | 6664  | +/+   | <b>Pde4a</b>          | Phosphodiesterase               | 9  | intron 7          | disrupt CDS                | inv         |
| AKXD-27 | 7338  | ko/ko | <b>Ubi7</b>           | Ubiquitin-like                  | 9  | 5 prime           | 0.275kb                    | same        |
| AKXD-14 | 3197  | ko/ko | <b>Ubi7</b>           | Ubiquitin-like                  | 9  | 5 prime           | 0.175kb                    | same        |
| AKXD-10 | 10092 | ko/ko | <b>Coro2b</b>         | Actin binding protein           | 9  | intron 3          | disrupt CDS                | inv         |
| AKXD-10 | 12210 | ko/ko | <b>Coro2b</b>         | Actin binding protein           | 9  | intron 3          | disrupt CDS                | inv         |
| AKXD-10 | 11675 | ko/ko | <b>Lactb</b>          | Ribosomal protein               | 9  | 5 prime           | 1.611kb                    | inv         |
| AKXD-27 | 7403  | +/+   | <b>Lactb</b>          | Ribosomal protein               | 9  | 5 prime           | 1.869kb                    | same        |
| AKXD-10 | 12172 | +/+   | <b>Gclc</b>           | Glutathione biosynthesis        | 9  | 3 prime           | 140.378kb                  | same        |
| AKXD-10 | 14328 | ko/ko | <b>Gclc</b>           | Glutathione biosynthesis        | 9  | 3 prime           | 140.673kb                  | same        |
| AKXD-14 | 3162  | ko/ko | <b>Gpx1</b>           | Oxidoreductase                  | 9  | intron 1          | disrupt CDS                | same        |
| AKXD-27 | 7244  | ko/ko | <b>Gpx1</b>           | Oxidoreductase                  | 9  | exon 2            | disrupt CDS                | same        |
| AKXD-27 | 6661  | +/+   | <b>Glb1</b>           | Galactosidase                   | 9  | 5 prime           | 0.594kb                    | inv         |
| AKXD-14 | 3204  | +/+   | <b>Glb1</b>           | Galactosidase                   | 9  | 5 prime           | 0.398kb                    | same        |
| AKXD-14 | 4316  | ko/ko | <b>1500010M16Rik</b>  | Translation initiation          | 9  | 5 prime           | 1.2kb                      | inv         |
| AKXD-10 | 14106 | +/+   | <b>1500010M16Rik</b>  | Translation initiation          | 9  | 5 prime           | 0.457kb                    | inv         |
| AKXD-14 | 3098  | ko/ko | <b>Zdhhc3</b>         | Endopeptidase                   | 9  | intron 3          | disrupt CDS                | same        |
| AKXD-10 | 12169 | ko/ko | <b>Zdhhc3</b>         | Endopeptidase                   | 9  | 5 prime           | 0.711kb                    | same        |
| AKXD-27 | 8763  | +/+   | <b>Ahi1   Myb</b>     | Unknown/transcription factor    | 10 | exon 24   3 prime | not disrupt CDS   44.827kb | inv   same  |

|         |       |       |                               |                                      |    |                     |                            |             |
|---------|-------|-------|-------------------------------|--------------------------------------|----|---------------------|----------------------------|-------------|
| AKXD-14 | 3020  | +/+   | <i>Ahi1</i>   <i>Myb</i>      | Unknown/transcription factor         | 10 | 3 prime   intron 13 | 58.936kb   disrupt CDS     | inv   same  |
| AKXD-27 | 6967  | +/+   | <i>Ahi1</i>   <i>Myb</i>      | Unknown/transcription factor         | 10 | 3 prime   5 prime   | 147.968kb   67.764kb       | same   inv  |
| AKXD-14 | 4146  | +/+   | <i>Ahi1</i>   <i>Myb</i>      | Unknown/transcription factor         | 10 | 3 prime   5 prime   | 158.885kb   78.681kb       | same   inv  |
| AKXD-27 | 7403  | +/+   | <i>Ahi1</i>   <i>Myb</i>      | Unknown/transcription factor         | 10 | 3 prime   5 prime   | 161.181kb   80.977kb       | same   inv  |
| AKXD-14 | 3280  | ko/ko | <i>Ahi1</i>   <i>Myb</i>      | Unknown/transcription factor         | 10 | 3 prime   5 prime   | 163.607kb   83.403kb       | same   inv  |
| AKXD-27 | 8760  | +/+   | <i>Ahi1</i>   <i>Myb</i>      | Unknown/transcription factor         | 10 | 3 prime   5 prime   | 165.232kb   85.028kb       | inv   same  |
| AKXD-10 | 11590 | ko/ko | <b><i>Rtn4ip1</i></b>         | Mitochondrial protein                | 10 | 5 prime             | 83.386kb                   | inv         |
| AKXD-14 | 3134  | ko/ko | <b><i>Rtn4ip1</i></b>         | Mitochondrial protein                | 10 | 5 prime             | 74.629kb                   | same        |
| AKXD-27 | 7405  | +/+   | <b><i>Rtn4ip1</i></b>         | Mitochondrial protein                | 10 | 5 prime             | 72.993kb                   | same        |
| AKXD-14 | 4149  | ko/ko | <i>Prdm1</i>                  | Zinc finger protein                  | 10 | intron 4            | disrupt CDS                | same        |
| AKXD-10 | 11978 | ko/ko | <i>Prdm1</i>                  | Zinc finger protein                  | 10 | intron 4            | disrupt CDS                | inv         |
| AKXD-27 | 7088  | ko/ko | <i>Prdm1</i>                  | Zinc finger protein                  | 10 | intron 4            | disrupt CDS                | same        |
| AKXD-14 | 3134  | ko/ko | <i>Prdm1</i>                  | Zinc finger protein                  | 10 | intron 3            | disrupt CDS                | same        |
| AKXD-10 | 13743 | ko/ko | <b><i>3110049J23Rik</i></b>   | Oxidoreductase                       | 10 | 5 prime             | 1.506kb                    | inv         |
| AKXD-10 | 11814 | +/+   | <b><i>3110049J23Rik</i></b>   | Oxidoreductase                       | 10 | exon 1              | not disrupt CDS            | same        |
| AKXD-10 | 13743 | ko/ko | <b><i>Slc19a1</i></b>         | Solute carrier protein               | 10 | 5 prime             | 0.69kb                     | inv         |
| AKXD-14 | 3055  | +/+   | <b><i>Slc19a1</i></b>         | Solute carrier protein               | 10 | intron 1            | not disrupt CDS            | inv         |
| AKXD-10 | 11985 | ko/ko | <i>Pttglip</i>                | Pituitary transforming 1 interacting | 10 | 3 prime             | 7.048kb                    | same        |
| AKXD-27 | 8172  | +/+   | <b><i>Pttglip</i></b>         | Pituitary transforming 1 interacting | 10 | 3 prime             | 7.091kb                    | same        |
| AKXD-27 | 8442  | ko/ko | <b><i>1200008N06Rik</i></b>   | Rho GTPase                           | 10 | intron 1            | disrupt CDS                | same        |
| AKXD-14 | 5046  | ko/ko | <b><i>1200008N06Rik</i></b>   | Rho GTPase                           | 10 | intron 1            | disrupt CDS                | same        |
| AKXD-10 | 11580 | +/+   | <b><i>1200008N06Rik</i></b>   | Rho GTPase                           | 10 | 5 prime             | 0.37kb                     | inv         |
| AKXD-14 | 3376  | +/+   | <i>Cirbp</i>                  | RNA binding protein                  | 10 | 5 prime             | 10.068kb                   | same        |
| AKXD-14 | 3387  | ko/ko | <b><i>Cirbp</i></b>           | RNA binding protein                  | 10 | 5 prime             | 9.202kb                    | same        |
| AKXD-10 | 12175 | ko/ko | <i>Tcfe2a</i>                 | Transcription factor                 | 10 | intron 1            | not disrupt CDS            | same        |
| AKXD-10 | 11558 | ko/ko | <i>Tcfe2a</i>                 | Transcription factor                 | 10 | intron 1            | not disrupt CDS            | same        |
| AKXD-14 | 3371  | +/+   | <i>Tcfe2a</i>                 | Transcription factor                 | 10 | 5 prime             | 0.105kb                    | same        |
| AKXD-27 | 7105  | ko/ko | <i>Tcfe2a</i>                 | Transcription factor                 | 10 | 5 prime             | 2.712 kb                   | inv         |
| AKXD-10 | 11411 | ko/ko | <b><i>Scamp4</i></b>          | Secretory protein                    | 10 | 5 prime             | 0.16kb                     | same        |
| AKXD-27 | 8160  | +/+   | <b><i>Scamp4</i></b>          | Secretory protein                    | 10 | 3 prime             | 5.951kb                    | inv         |
| AKXD-10 | 13743 | ko/ko | <i>Ebf1</i>                   | Transcription factor                 | 11 | 5 prime             | 0.245kb                    | inv         |
| AKXD-10 | 12171 | +/+   | <b><i>Ebf1</i></b>            | Transcription factor                 | 11 | 5 prime             | 0.038kb                    | inv         |
| AKXD-10 | 11670 | ko/ko | <i>ltk</i>                    | Kinase                               | 11 | 3 prime             | 13.998kb                   | same        |
| AKXD-27 | 6995  | +/+   | <b><i>ltk</i></b>             | Kinase                               | 11 | 3 prime             | 13.998kb                   | same        |
| AKXD-10 | 14100 | ko/ko | <b><i>C330016O10Rik</i></b>   | Protein targeting                    | 11 | exon 4              | disrupt CDS                | same        |
| AKXD-10 | 11978 | ko/ko | <b><i>C330016O10Rik</i></b>   | Protein targeting                    | 11 | intron 3            | disrupt CDS                | inv         |
| AKXD-27 | 8402  | ko/ko | <i>Il5</i>   <i>Irf1</i>      | Cytokine/interferon regulator        | 11 | 3 prime   3 prime   | 70.256kb   18.036kb        | inv   inv   |
| AKXD-14 | 3286  | ko/ko | <i>Il5</i>   <i>Irf1</i>      | Cytokine/interferon regulator        | 11 | 3 prime   3 prime   | 70.608kb   18.388kb        | inv   inv   |
| AKXD-14 | 3098  | ko/ko | <b><i>Tnfrsf13b</i></b>       | Tnf receptor subfamily               | 11 | 5 prime             | 30.729kb                   | inv         |
| AKXD-14 | 3046  | ko/ko | <b><i>Tnfrsf13b</i></b>       | Tnf receptor subfamily               | 11 | 5 prime             | 16.79kb                    | inv         |
| AKXD-14 | 3276  | +/+   | <b><i>Chd3</i></b>            | Helicase                             | 11 | 3 prime             | 30.099kb                   | inv         |
| AKXD-27 | 6965  | ko/ko | <b><i>Chd3</i></b>            | Helicase                             | 11 | 5 prime             | 10.81kb                    | same        |
| AKXD-14 | 3275  | ko/ko | <b><i>Chd3</i></b>            | Helicase                             | 11 | 5 prime             | 12.83kb                    | inv         |
| AKXD-14 | 3381  | ko/ko | <i>Pfn1</i>                   | Actin polymerization                 | 11 | intron 1            | disrupt CDS                | inv         |
| AKXD-27 | 7230  | ko/ko | <b><i>Pfn1</i></b>            | Actin polymerization                 | 11 | 5 prime             | 0.303kb                    | same        |
| AKXD-10 | 11680 | ko/ko | <i>AI317223</i>               | Undefined                            | 11 | 5 prime             | 56.503kb                   | inv         |
| AKXD-10 | 11591 | ko/ko | <i>AI317223</i>               | Undefined                            | 11 | 5 prime             | 17.55kb                    | inv         |
| AKXD-10 | 12218 | ko/ko | <i>AI317223</i>               | Undefined                            | 11 | 5 prime             | 5.723kb                    | same        |
| AKXD-27 | 6648  | ko/ko | <i>AI317223</i>               | Undefined                            | 11 | intron 2            | disrupt CDS                | inv         |
| AKXD-10 | 11746 | ko/ko | <i>Hic1</i>   <i>Dph2l1</i>   | Hypermethylated/toxin resistance     | 11 | 5 prime   3 prime   | 2.548kb   5.576kb          | same   same |
| AKXD-27 | 7233  | +/+   | <i>Hic1</i>   <i>Dph2l1</i>   | Hypermethylated/toxin resistance     | 11 | 5 prime   3 prime   | 3.812kb   4.312kb          | inv   inv   |
| AKXD-10 | 11977 | +/+   | <i>Hic1</i>   <i>Dph2l1</i>   | Hypermethylated/toxin resistance     | 11 | 5 prime   intron 3  | 15.395kb   disrupt CDS     | inv   inv   |
| AKXD-27 | 7219  | ko/ko | <b><i>Pps</i></b>             | Phosphatase                          | 11 | 3 prime             | 4.788kb                    | inv         |
| AKXD-10 | 11979 | ko/ko | <b><i>Pps</i></b>             | Phosphatase                          | 11 | 3 prime             | 6.239kb                    | same        |
| AKXD-10 | 13738 | ko/ko | <i>Nf1</i>                    | Ras GTPase                           | 11 | intron 36           | disrupt CDS                | inv         |
| AKXD-14 | 4302  | +/+   | <i>Nf1</i>                    | Ras GTPase                           | 11 | intron 36           | disrupt CDS                | same        |
| AKXD-27 | 7405  | +/+   | <b><i>Cdk5r</i></b>           | Cdk receptor                         | 11 | 3 prime             | 27.993kb                   | inv         |
| AKXD-27 | 7422  | ko/ko | <b><i>Cdk5r</i></b>           | Cdk receptor                         | 11 | 3 prime             | 28.343kb                   | same        |
| AKXD-10 | 12180 | +/+   | <b><i>Usp32</i></b>           | Ubiquitin protease                   | 11 | 3 prime             | 1.392kb                    | inv         |
| AKXD-10 | 11395 | ko/ko | <b><i>Usp32</i></b>           | Ubiquitin protease                   | 11 | 3 prime             | 0.954kb                    | inv         |
| AKXD-10 | 11401 | ko/ko | <b><i>Usp32</i></b>           | Ubiquitin protease                   | 11 | 3 prime             | 0.953kb                    | inv         |
| AKXD-14 | 3275  | ko/ko | <b><i>Tbx21</i></b>           | T-box protein                        | 11 | intron 1            | disrupt CDS                | inv         |
| AKXD-27 | 7232  | ko/ko | <b><i>Tbx21</i></b>           | T-box protein                        | 11 | 5 prime             | 26.064kb                   | same        |
| AKXD-10 | 12210 | ko/ko | <i>Ccr7</i>                   | Chemokine receptor                   | 11 | 5 prime             | 0.701kb                    | inv         |
| AKXD-27 | 7102  | ko/ko | <i>Ccr7</i>                   | Chemokine receptor                   | 11 | 5 prime             | 12.437kb                   | same        |
| AKXD-14 | 3280  | ko/ko | <i>Stat5a</i>   <i>Stat5b</i> | Signal transduction                  | 11 | 5 prime   intron 1  | 40.138kb   not disrupt CDS | same   inv  |
| AKXD-14 | 3128  | +/+   | <i>Stat5a</i>   <i>Stat5b</i> | Signal transduction                  | 11 | 5 prime   5 prime   | 33.176kb   3.709kb         | same   inv  |
| AKXD-27 | 7376  | ko/ko | <i>Stat5a</i>   <i>Stat5b</i> | Signal transduction                  | 11 | 5 prime   5 prime   | 8.453kb   28.432kb         | inv   same  |
| AKXD-10 | 11582 | ko/ko | <i>Stat5a</i>   <i>Stat5b</i> | Signal transduction                  | 11 | 5 prime   5 prime   | 8.118kb   28.767kb         | inv   same  |
| AKXD-10 | 11980 | ko/ko | <i>Stat5a</i>   <i>Stat5b</i> | Signal transduction                  | 11 | 5 prime   5 prime   | 7.345kb   29.54kb          | same   inv  |
| AKXD-27 | 7069  | ko/ko | <i>Stat5a</i>   <i>Stat5b</i> | Signal transduction                  | 11 | intron 1   5 prime  | not disrupt CDS   37.462kb | inv   same  |
| AKXD-27 | 6644  | +/+   | <b><i>Cip1</i></b>            | Transcriptional repressor            | 11 | 5 prime             | 0.673kb                    | inv         |
| AKXD-14 | 3098  | ko/ko | <b><i>Cip1</i></b>            | Transcriptional repressor            | 11 | exon 1              | not disrupt CDS            | same        |
| AKXD-14 | 3296  | ko/ko | <b><i>Pecam</i></b>           | Rho signaling                        | 11 | 5 prime             | 37.287kb                   | inv         |
| AKXD-27 | 7405  | +/+   | <b><i>Pecam</i></b>           | Rho signaling                        | 11 | 5 prime             | 46.48kb                    | inv         |
| AKXD-27 | 6641  | ko/ko | <b><i>Pecam</i></b>           | Rho signaling                        | 11 | 5 prime             | 47.555kb                   | inv         |
| AKXD-14 | 3381  | ko/ko | <b><i>Cbx4</i></b>            | Chromatin assembly                   | 11 | 5 prime             | 35.577kb                   | inv         |
| AKXD-27 | 8444  | +/+   | <b><i>Cbx4</i></b>            | Chromatin assembly                   | 11 | 5 prime             | 42.751kb                   | inv         |
| AKXD-27 | 8147  | ko/ko | <i>Nmyc1</i>                  | Transcription factor                 | 12 | exon 3              | disrupt CDS                | inv         |
| AKXD-27 | 8635  | ko/ko | <i>Nmyc1</i>                  | Transcription factor                 | 12 | exon 3              | disrupt CDS                | inv         |
| AKXD-27 | 8760  | +/+   | <i>Nmyc1</i>                  | Transcription factor                 | 12 | intron 1            | not disrupt CDS            | same        |
| AKXD-10 | 13831 | +/+   | <b><i>Idb2</i></b>            | Transcription factor inhibitor       | 12 | 5 prime             | 87.013kb                   | same        |
| AKXD-27 | 7221  | ko/ko | <b><i>Idb2</i></b>            | Transcription factor inhibitor       | 12 | 5 prime             | 114.294kb                  | inv         |
| AKXD-14 | 3277  | +/+   | <b><i>Arf6</i></b>            | ADP-ribosylation                     | 12 | 5 prime             | 0.76kb                     | inv         |
| AKXD-10 | 12183 | ko/ko | <b><i>Arf6</i></b>            | ADP-ribosylation                     | 12 | 5 prime             | 0.626kb                    | inv         |
| AKXD-27 | 7395  | +/+   | <b><i>Arf6</i></b>            | ADP-ribosylation                     | 12 | 3 prime             | 0.143kb                    | inv         |
| AKXD-10 | 11767 | +/+   | <b><i>Arf6</i></b>            | ADP-ribosylation                     | 12 | 3 prime             | 82.025kb                   | inv         |

|         |       |       |                      |                                  |    |           |                 |      |
|---------|-------|-------|----------------------|----------------------------------|----|-----------|-----------------|------|
| AKXD-14 | 3127  | +/+   | <b>Plek2</b>         | Signalling, protein biosynthesis | 12 | 5 prime   | 75.079kb        | inv  |
| AKXD-14 | 3286  | ko/ko | <b>Plek2</b>         | Signalling, protein biosynthesis | 12 | 5 prime   | 99.312kb        | same |
| AKXD-10 | 12182 | +/+   | <b>Pnma1</b>         | Undefined                        | 12 | 5 prime   | 39.327kb        | same |
| AKXD-27 | 6896  | +/+   | <b>Pnma1</b>         | Undefined                        | 12 | 5 prime   | 45.979kb        | inv  |
| AKXD-14 | 3203  | +/+   | <b>Jundm2</b>        | Transcription factor             | 12 | 5 prime   | 54.515kb        | inv  |
| AKXD-14 | 3197  | ko/ko | <b>Jundm2</b>        | Transcription factor             | 12 | 5 prime   | 54.084kb        | inv  |
| AKXD-27 | 7239  | +/+   | <b>Batf</b>          | Transcription factor             | 12 | 5 prime   | 25.556kb        | same |
| AKXD-10 | 12169 | ko/ko | <b>Batf</b>          | Transcription factor             | 12 | 5 prime   | 0.866kb         | inv  |
| AKXD-27 | 8172  | +/+   | <b>Gtf2a1</b>        | Transcription factor             | 12 | 5 prime   | 0.308kb         | inv  |
| AKXD-14 | 3280  | ko/ko | <b>Gtf2a1</b>        | Transcription factor             | 12 | 5 prime   | 0.335kb         | same |
| AKXD-27 | 6645  | +/+   | <b>Elmo1</b>         | Phagocytosis/cell migration      | 13 | intron 14 | disrupt CDS     | inv  |
| AKXD-14 | 3134  | ko/ko | <b>Elmo1</b>         | Phagocytosis/cell migration      | 13 | intron 14 | disrupt CDS     | inv  |
| AKXD-10 | 11984 | ko/ko | <b>Sox4</b>          | Transcription factor             | 13 | 3 prime   | 65.559kb        | same |
| AKXD-10 | 12002 | ko/ko | <b>Sox4</b>          | Transcription factor             | 13 | 3 prime   | 10.257kb        | inv  |
| AKXD-27 | 6648  | ko/ko | <b>Sox4</b>          | Transcription factor             | 13 | 3 prime   | 7.173kb         | inv  |
| AKXD-10 | 11976 | ko/ko | <b>Sox4</b>          | Transcription factor             | 13 | 3 prime   | 6.562kb         | same |
| AKXD-10 | 11979 | ko/ko | <b>Sox4</b>          | Transcription factor             | 13 | 3 prime   | 6.22kb          | same |
| AKXD-10 | 11414 | +/+   | <b>Sox4</b>          | Transcription factor             | 13 | 3 prime   | 2.926kb         | same |
| AKXD-10 | 11746 | ko/ko | <b>Sox4</b>          | Transcription factor             | 13 | 3 prime   | 1.748kb         | same |
| AKXD-10 | 14443 | +/+   | <b>Sox4</b>          | Transcription factor             | 13 | 3 prime   | 1.387kb         | same |
| AKXD-10 | 11818 | ko/ko | <b>Sox4</b>          | Transcription factor             | 13 | 3 prime   | 0.9kb           | same |
| AKXD-10 | 13847 | ko/ko | <b>Sox4</b>          | Transcription factor             | 13 | 3 prime   | 0.895kb         | same |
| AKXD-14 | 3098  | ko/ko | <b>Sox4</b>          | Transcription factor             | 13 | 3 prime   | 0.833kb         | same |
| AKXD-10 | 12183 | ko/ko | <b>Sox4</b>          | Transcription factor             | 13 | 3 prime   | 0.753kb         | same |
| AKXD-27 | 7412  | ko/ko | <b>Sox4</b>          | Transcription factor             | 13 | 3 prime   | 0.544kb         | same |
| AKXD-10 | 11423 | ko/ko | <b>Sox4</b>          | Transcription factor             | 13 | 3 prime   | 0.522kb         | same |
| AKXD-14 | 3381  | ko/ko | <b>Sox4</b>          | Transcription factor             | 13 | 3 prime   | 0.52kb          | same |
| AKXD-10 | 11402 | +/+   | <b>Sox4</b>          | Transcription factor             | 13 | 3 prime   | 0.473kb         | same |
| AKXD-10 | 11580 | +/+   | <b>Sox4</b>          | Transcription factor             | 13 | 3 prime   | 0.207kb         | same |
| AKXD-27 | 8408  | ko/ko | <b>Sox4</b>          | Transcription factor             | 13 | 3 prime   | 0.177kb         | same |
| AKXD-27 | 6992  | +/+   | <b>Sox4</b>          | Transcription factor             | 13 | 3 prime   | 0.064kb         | same |
| AKXD-14 | 4147  | +/+   | <b>Sox4</b>          | Transcription factor             | 13 | exon 1    | not disrupt CDS | same |
| AKXD-14 | 3285  | ko/ko | <b>Sox4</b>          | Transcription factor             | 13 | exon 1    | not disrupt CDS | same |
| AKXD-14 | 3127  | +/+   | <b>Sox4</b>          | Transcription factor             | 13 | exon 1    | not disrupt CDS | same |
| AKXD-27 | 7103  | +/+   | <b>Sox4</b>          | Transcription factor             | 13 | exon 1    | not disrupt CDS | same |
| AKXD-27 | 8444  | +/+   | <b>Sox4</b>          | Transcription factor             | 13 | exon 1    | not disrupt CDS | same |
| AKXD-10 | 14101 | ko/ko | <b>Sox4</b>          | Transcription factor             | 13 | exon 1    | not disrupt CDS | same |
| AKXD-10 | 11419 | +/+   | <b>Sox4</b>          | Transcription factor             | 13 | exon 1    | not disrupt CDS | same |
| AKXD-27 | 7105  | ko/ko | <b>Sox4</b>          | Transcription factor             | 13 | exon 1    | not disrupt CDS | same |
| AKXD-27 | 7219  | ko/ko | <b>Sox4</b>          | Transcription factor             | 13 | exon 1    | not disrupt CDS | same |
| AKXD-14 | 3053  | +/+   | <b>Sox4</b>          | Transcription factor             | 13 | exon 1    | not disrupt CDS | same |
| AKXD-27 | 6967  | +/+   | <b>Sox4</b>          | Transcription factor             | 13 | exon 1    | not disrupt CDS | same |
| AKXD-27 | 7422  | ko/ko | <b>Sox4</b>          | Transcription factor             | 13 | exon 1    | not disrupt CDS | same |
| AKXD-14 | 3037  | ko/ko | <b>Sox4</b>          | Transcription factor             | 13 | exon 1    | not disrupt CDS | same |
| AKXD-27 | 6641  | ko/ko | <b>Sox4</b>          | Transcription factor             | 13 | exon 1    | not disrupt CDS | same |
| AKXD-10 | 11664 | ko/ko | <b>Sox4</b>          | Transcription factor             | 13 | exon 1    | not disrupt CDS | same |
| AKXD-27 | 7395  | +/+   | <b>Sox4</b>          | Transcription factor             | 13 | exon 1    | not disrupt CDS | same |
| AKXD-14 | 3367  | +/+   | <b>Sox4</b>          | Transcription factor             | 13 | exon 1    | not disrupt CDS | same |
| AKXD-10 | 11819 | ko/ko | <b>Sox4</b>          | Transcription factor             | 13 | exon 1    | not disrupt CDS | same |
| AKXD-14 | 4149  | ko/ko | <b>Sox4</b>          | Transcription factor             | 13 | exon 1    | not disrupt CDS | same |
| AKXD-14 | 5044  | +/+   | <b>Sox4</b>          | Transcription factor             | 13 | exon 1    | not disrupt CDS | same |
| AKXD-27 | 7420  | +/+   | <b>Sox4</b>          | Transcription factor             | 13 | exon 1    | not disrupt CDS | same |
| AKXD-10 | 11591 | ko/ko | <b>Sox4</b>          | Transcription factor             | 13 | 5 prime   | 0.712kb         | inv  |
| AKXD-10 | 12186 | +/+   | <b>Sox4</b>          | Transcription factor             | 13 | 5 prime   | 1.329kb         | inv  |
| AKXD-27 | 8417  | ko/ko | <b>Sox4</b>          | Transcription factor             | 13 | 5 prime   | 3.195kb         | inv  |
| AKXD-10 | 11767 | +/+   | <b>Sox4</b>          | Transcription factor             | 13 | 5 prime   | 3.28kb          | inv  |
| AKXD-14 | 3296  | ko/ko | <b>E2f3</b>          | Transcription factor             | 13 | intron 1  | disrupt CDS     | inv  |
| AKXD-10 | 14328 | ko/ko | <b>E2f3</b>          | Transcription factor             | 13 | exon 1    | disrupt CDS     | inv  |
| AKXD-27 | 8309  | ko/ko | <b>3110004L20Rik</b> | Undefined                        | 13 | intron 1  | disrupt CDS     | same |
| AKXD-27 | 6648  | ko/ko | <b>3110004L20Rik</b> | Undefined                        | 13 | intron 1  | disrupt CDS     | inv  |
| AKXD-27 | 7405  | +/+   | <b>Rreb1</b>         | Transcription factor             | 13 | 5 prime   | 24.967kb        | inv  |
| AKXD-10 | 14443 | +/+   | <b>Rreb1</b>         | Transcription factor             | 13 | 5 prime   | 24.727kb        | inv  |
| AKXD-10 | 12186 | +/+   | <b>Rreb1</b>         | Transcription factor             | 13 | 5 prime   | 2.102kb         | inv  |
| AKXD-14 | 3031  | ko/ko | <b>Rreb1</b>         | Transcription factor             | 13 | 5 prime   | 1.394kb         | inv  |
| AKXD-14 | 3296  | ko/ko | <b>Rreb1</b>         | Transcription factor             | 13 | 5 prime   | 1.394kb         | inv  |
| AKXD-10 | 11979 | ko/ko | <b>Rreb1</b>         | Transcription factor             | 13 | 5 prime   | 1.352kb         | inv  |
| AKXD-10 | 11664 | ko/ko | <b>Rreb1</b>         | Transcription factor             | 13 | 5 prime   | 0.703kb         | inv  |
| AKXD-27 | 6965  | ko/ko | <b>Gadd45g</b>       | MAPKK activation                 | 13 | 5 prime   | 77.509kb        | inv  |
| AKXD-27 | 7425  | ko/ko | <b>Gadd45g</b>       | MAPKK activation                 | 13 | 5 prime   | 77.484kb        | inv  |
| AKXD-27 | 6900  | ko/ko | <b>Pitx1</b>         | Homeodomain protein              | 13 | 5 prime   | 35.182kb        | inv  |
| AKXD-10 | 14038 | +/+   | <b>Pitx1</b>         | Homeodomain protein              | 13 | 5 prime   | 35.601kb        | inv  |
| AKXD-14 | 4316  | ko/ko | <b>Mef2c</b>         | Transcription enhancer factor    | 13 | intron 2  | not disrupt CDS | same |
| AKXD-27 | 8888  | +/+   | <b>Mef2c</b>         | Transcription enhancer factor    | 13 | intron 2  | not disrupt CDS | same |
| AKXD-14 | 5039  | ko/ko | <b>Mef2c</b>         | Transcription enhancer factor    | 13 | intron 2  | not disrupt CDS | same |
| AKXD-14 | 3055  | +/+   | <b>Mef2c</b>         | Transcription enhancer factor    | 13 | intron 2  | not disrupt CDS | same |
| AKXD-27 | 8557  | +/+   | <b>Enc1</b>          | Phosphatase                      | 13 | 5 prime   | 0.695kb         | inv  |
| AKXD-10 | 11390 | +/+   | <b>Enc1</b>          | Phosphatase                      | 13 | intron 1  | not disrupt CDS | inv  |
| AKXD-10 | 11668 | ko/ko | <b>Kcnk5</b>         | Potassium channel                | 14 | intron 1  | disrupt CDS     | same |
| AKXD-27 | 8444  | +/+   | <b>Kcnk5</b>         | Potassium channel                | 14 | intron 1  | disrupt CDS     | inv  |
| AKXD-27 | 8146  | +/+   | <b>D14Erd171e</b>    | Undefined                        | 14 | 5 prime   | 53.592 kb       | same |
| AKXD-10 | 11818 | ko/ko | <b>D14Erd171e</b>    | Undefined                        | 14 | 5 prime   | 53.752 kb       | inv  |
| AKXD-10 | 11390 | +/+   | <b>Gmfb</b>          | Growth factor                    | 14 | intron 1  | disrupt CDS     | same |
| AKXD-14 | 3134  | ko/ko | <b>Gmfb</b>          | Growth factor                    | 14 | intron 1  | disrupt CDS     | same |
| AKXD-10 | 14043 | ko/ko | <b>Cldn10</b>        | Tight junction protein           | 14 | intron 1  | disrupt CDS     | inv  |
| AKXD-14 | 3280  | ko/ko | <b>Cldn10</b>        | Tight junction protein           | 14 | intron 1  | disrupt CDS     | inv  |
| AKXD-27 | 7239  | +/+   | <b>Ghr</b>           | Cell receptor                    | 15 | exon 1    | not disrupt CDS | inv  |
| AKXD-14 | 3100  | +/+   | <b>Ghr</b>           | Cell receptor                    | 15 | 5 prime   | 0.602kb         | inv  |

|         |       |       |                |                            |    |          |                 |      |
|---------|-------|-------|----------------|----------------------------|----|----------|-----------------|------|
| AKXD-14 | 3127  | +/+   | <b>Prlr</b>    | Cell receptor              | 15 | 5 prime  | 148.72kb        | inv  |
| AKXD-27 | 7390  | ko/ko | <b>Prlr</b>    | Cell receptor              | 15 | 5 prime  | 111.153kb       | inv  |
| AKXD-14 | 3371  | +/+   | <b>Prlr</b>    | Cell receptor              | 15 | 5 prime  | 109.923kb       | inv  |
| AKXD-27 | 8751  | ko/ko | <b>Prlr</b>    | Cell receptor              | 15 | 5 prime  | 108.943kb       | inv  |
| AKXD-10 | 11398 | +/+   | <b>Myc</b>     | Transcription factor       | 15 | 5 prime  | 1.558kb         | inv  |
| AKXD-14 | 3196  | +/+   | <b>Myc</b>     | Transcription factor       | 15 | 5 prime  | 1.345kb         | same |
| AKXD-14 | 3203  | +/+   | <b>Myc</b>     | Transcription factor       | 15 | 5 prime  | 1.082kb         | inv  |
| AKXD-14 | 3132  | +/+   | <b>Myc</b>     | Transcription factor       | 15 | 5 prime  | 1.06kb          | inv  |
| AKXD-27 | 7425  | ko/ko | <b>Myc</b>     | Transcription factor       | 15 | 5 prime  | 0.578kb         | inv  |
| AKXD-10 | 12211 | ko/ko | <b>Myc</b>     | Transcription factor       | 15 | 5 prime  | 0.578kb         | same |
| AKXD-10 | 11567 | ko/ko | <b>Myc</b>     | Transcription factor       | 15 | 5 prime  | 0.54kb          | inv  |
| AKXD-27 | 8559  | +/+   | <b>Myc</b>     | Transcription factor       | 15 | 5 prime  | 0.5kb           | inv  |
| AKXD-27 | 8763  | +/+   | <b>Myc</b>     | Transcription factor       | 15 | 5 prime  | 0.468kb         | inv  |
| AKXD-10 | 11985 | ko/ko | <b>Myc</b>     | Transcription factor       | 15 | 3 prime  | 49.557kb        | inv  |
| AKXD-14 | 3276  | +/+   | <b>Myc</b>     | Transcription factor       | 15 | 3 prime  | 122.277kb       | same |
| AKXD-14 | 3195  | +/+   | <b>Myc</b>     | Transcription factor       | 15 | 3 prime  | 155.679kb       | same |
| AKXD-27 | 6967  | +/+   | <b>Myc</b>     | Transcription factor       | 15 | 3 prime  | 186.564kb       | same |
| AKXD-27 | 8756  | ko/ko | <b>Ptp4a3</b>  | Protein phosphatase        | 15 | 5 prime  | 22.841kb        | inv  |
| AKXD-14 | 3108  | ko/ko | <b>Ptp4a3</b>  | Protein phosphatase        | 15 | 5 prime  | 22.763kb        | inv  |
| AKXD-27 | 7369  | ko/ko | <b>Ly6e</b>    | Cell-surface glycoprotein  | 15 | 5 prime  | 20.411kb        | inv  |
| AKXD-14 | 3053  | +/+   | <b>Ly6e</b>    | Cell-surface glycoprotein  | 15 | intron 1 | not disrupt CDS | same |
| AKXD-14 | 3031  | ko/ko | <b>Ly6e</b>    | Cell-surface glycoprotein  | 15 | 3 prime  | 2.443kb         | same |
| AKXD-10 | 13844 | ko/ko | <b>Tob2</b>    | ErbB2 transducer           | 15 | 3 prime  | 15.894kb        | inv  |
| AKXD-10 | 11664 | ko/ko | <b>Tob2</b>    | ErbB2 transducer           | 15 | 5 prime  | 5.985kb         | same |
| AKXD-27 | 8352  | ko/ko | <b>Slc38a4</b> | Amino acid transport       | 15 | 5 prime  | 9.606kb         | inv  |
| AKXD-27 | 8763  | +/+   | <b>Slc38a4</b> | Amino acid transport       | 15 | 5 prime  | 10.924kb        | inv  |
| AKXD-10 | 11400 | ko/ko | <b>Slc38a4</b> | Amino acid transport       | 15 | 5 prime  | 11.073kb        | inv  |
| AKXD-27 | 7088  | ko/ko | <b>Ela1</b>    | Pancreatic elastase        | 15 | 3 prime  | 18.354kb        | same |
| AKXD-14 | 5039  | ko/ko | <b>Ela1</b>    | Pancreatic elastase        | 15 | intron 6 | disrupt CDS     | inv  |
| AKXD-27 | 7379  | ko/ko | <b>Gspt1</b>   | GTPase, cell cycle control | 16 | intron 1 | disrupt CDS     | inv  |
| AKXD-27 | 8760  | +/+   | <b>Gspt1</b>   | GTPase, cell cycle control | 16 | intron 1 | disrupt CDS     | same |
| AKXD-14 | 3196  | +/+   | <b>Eif4a2</b>  | Translation initiation     | 16 | 5 prime  | 1.243kb         | inv  |
| AKXD-27 | 7389  | ko/ko | <b>Eif4a2</b>  | Translation initiation     | 16 | 5 prime  | 0.177kb         | same |
| AKXD-27 | 7422  | ko/ko | <b>Bcl6</b>    | Apoptosis                  | 16 | 5 prime  | 150.012kb       | same |
| AKXD-27 | 7390  | ko/ko | <b>Bcl6</b>    | Apoptosis                  | 16 | 5 prime  | 180.01kb        | inv  |
| AKXD-10 | 12218 | ko/ko | <b>Bcl6</b>    | Apoptosis                  | 16 | 5 prime  | 220.737kb       | inv  |
| AKXD-27 | 8558  | +/+   | <b>Bcl6</b>    | Apoptosis                  | 16 | 5 prime  | 231.887kb       | inv  |
| AKXD-27 | 7219  | ko/ko | <b>Ifnar1</b>  | Interferon receptor        | 16 | 5 prime  | 37.778kb        | same |
| AKXD-27 | 8408  | ko/ko | <b>Ifnar1</b>  | Interferon receptor        | 16 | 5 prime  | 0.578kb         | inv  |
| AKXD-10 | 12183 | ko/ko | <b>Ifnar1</b>  | Interferon receptor        | 16 | 5 prime  | 0.463kb         | inv  |
| AKXD-14 | 3046  | ko/ko | <b>Phf10</b>   | Transcriptional regulation | 17 | intron 2 | not disrupt CDS | inv  |
| AKXD-14 | 3195  | +/+   | <b>Phf10</b>   | Transcriptional regulation | 17 | intron 2 | not disrupt CDS | inv  |
| AKXD-14 | 4301  | ko/ko | <b>Phf10</b>   | Transcriptional regulation | 17 | intron 2 | not disrupt CDS | inv  |
| AKXD-10 | 12180 | +/+   | <b>Hmga1</b>   | Chromatin organization     | 17 | 5 prime  | 2.341kb         | inv  |
| AKXD-14 | 3166  | ko/ko | <b>Hmga1</b>   | Chromatin organization     | 17 | 5 prime  | 2.244kb         | same |
| AKXD-14 | 4316  | ko/ko | <b>Hmga1</b>   | Chromatin organization     | 17 | 5 prime  | 2.097kb         | same |
| AKXD-10 | 11398 | +/+   | <b>Hmga1</b>   | Chromatin organization     | 17 | 5 prime  | 0.706kb         | inv  |
| AKXD-14 | 5044  | +/+   | <b>Hmga1</b>   | Chromatin organization     | 17 | 3 prime  | 2.726kb         | inv  |
| AKXD-14 | 5046  | ko/ko | <b>Sfrs3</b>   | Splicing factor            | 17 | 5 prime  | 4.62kb          | inv  |
| AKXD-14 | 3280  | ko/ko | <b>Sfrs3</b>   | Splicing factor            | 17 | 5 prime  | 4.618kb         | inv  |
| AKXD-14 | 3387  | ko/ko | <b>Pim1</b>    | Protein kinase             | 17 | 5 prime  | 92.049kb        | inv  |
| AKXD-14 | 4147  | +/+   | <b>Pim1</b>    | Protein kinase             | 17 | 5 prime  | 52.415kb        | same |
| AKXD-27 | 8749  | +/+   | <b>Pim1</b>    | Protein kinase             | 17 | exon 7   | not disrupt CDS | same |
| AKXD-27 | 8635  | ko/ko | <b>Pim1</b>    | Protein kinase             | 17 | exon 7   | not disrupt CDS | same |
| AKXD-10 | 11402 | +/+   | <b>Pim1</b>    | Protein kinase             | 17 | exon 7   | not disrupt CDS | same |
| AKXD-27 | 7379  | ko/ko | <b>Cryaa</b>   | Crystallin                 | 17 | 3 prime  | 46.465kb        | same |
| AKXD-14 | 3162  | ko/ko | <b>Cryaa</b>   | Crystallin                 | 17 | 3 prime  | 64.915kb        | same |
| AKXD-14 | 3381  | ko/ko | <b>Tap2</b>    | ABC transporter            | 17 | 5 prime  | 0.346kb         | same |
| AKXD-14 | 4146  | +/+   | <b>Tap2</b>    | ABC transporter            | 17 | exon 1   | not disrupt CDS | inv  |
| AKXD-27 | 8557  | +/+   | <b>Ltb</b>     | Cytokine                   | 17 | 5 prime  | 5.209kb         | same |
| AKXD-27 | 8444  | +/+   | <b>Ltb</b>     | Cytokine                   | 17 | 3 prime  | 4.655kb         | inv  |
| AKXD-10 | 12186 | +/+   | <b>Nfkbie</b>  | Nfkb regulator             | 17 | exon 1   | disrupt CDS     | same |
| AKXD-27 | 6664  | +/+   | <b>Nfkbie</b>  | Nfkb regulator             | 17 | intron 1 | disrupt CDS     | same |
| AKXD-10 | 11582 | ko/ko | <b>Nfkbie</b>  | Nfkb regulator             | 17 | intron 1 | disrupt CDS     | same |
| AKXD-27 | 8445  | +/+   | <b>Nfkbie</b>  | Nfkb regulator             | 17 | intron 1 | disrupt CDS     | inv  |
| AKXD-14 | 3134  | ko/ko | <b>Ptcra</b>   | Pre-T cell receptor        | 17 | 3 prime  | 7.508kb         | inv  |
| AKXD-14 | 3196  | +/+   | <b>Ptcra</b>   | Pre-T cell receptor        | 17 | 5 prime  | 4.783kb         | inv  |
| AKXD-27 | 6967  | +/+   | <b>Ccnd3</b>   | Cell cycle regulator       | 17 | 5 prime  | 68.447kb        | inv  |
| AKXD-14 | 3095  | +/+   | <b>Ccnd3</b>   | Cell cycle regulator       | 17 | 5 prime  | 57.391kb        | inv  |
| AKXD-10 | 11419 | +/+   | <b>Ccnd3</b>   | Cell cycle regulator       | 17 | 5 prime  | 39.937kb        | inv  |
| AKXD-14 | 3110  | ko/ko | <b>Ccnd3</b>   | Cell cycle regulator       | 17 | exon 5   | not disrupt CDS | same |
| AKXD-27 | 6661  | +/+   | <b>Satb1</b>   | histone methylation        | 17 | 5 prime  | 72.948kb        | inv  |
| AKXD-27 | 7101  | +/+   | <b>Satb1</b>   | histone methylation        | 17 | 5 prime  | 74.286kb        | inv  |
| AKXD-10 | 11668 | ko/ko | <b>Em14</b>    | Undefined                  | 17 | 5 prime  | 72.498kb        | same |
| AKXD-14 | 3162  | ko/ko | <b>Em14</b>    | Undefined                  | 17 | 5 prime  | 72.378kb        | same |
| AKXD-27 | 7092  | ko/ko | <b>Em14</b>    | Undefined                  | 17 | 5 prime  | 72.253kb        | same |
| AKXD-14 | 3166  | ko/ko | <b>Map3k8</b>  | Kinase                     | 18 | intron 7 | disrupt CDS     | same |
| AKXD-27 | 8758  | ko/ko | <b>Map3k8</b>  | Kinase                     | 18 | intron 7 | disrupt CDS     | same |
| AKXD-14 | 3096  | +/+   | <b>Map3k8</b>  | Kinase                     | 18 | 5 prime  | 1.122kb         | inv  |
| AKXD-27 | 7069  | ko/ko | <b>Map3k8</b>  | Kinase                     | 18 | 5 prime  | 1.381kb         | same |
| AKXD-14 | 3285  | ko/ko | <b>Zfp521</b>  | Transcription factor       | 18 | exon 2   | disrupt CDS     | same |
| AKXD-10 | 11748 | ko/ko | <b>Zfp521</b>  | Transcription factor       | 18 | exon 2   | disrupt CDS     | same |
| AKXD-14 | 3197  | ko/ko | <b>Zfp521</b>  | Transcription factor       | 18 | exon 2   | disrupt CDS     | same |
| AKXD-27 | 8574  | +/+   | <b>Zfp521</b>  | Transcription factor       | 18 | exon 2   | disrupt CDS     | same |
| AKXD-27 | 8161  | +/+   | <b>Zfp521</b>  | Transcription factor       | 18 | exon 2   | disrupt CDS     | same |
| AKXD-10 | 10092 | ko/ko | <b>Zfp521</b>  | Transcription factor       | 18 | exon 2   | disrupt CDS     | same |
| AKXD-14 | 3096  | +/+   | <b>Zfp521</b>  | Transcription factor       | 18 | exon 2   | disrupt CDS     | same |

|         |       |       |                      |                                   |    |                   |                    |           |
|---------|-------|-------|----------------------|-----------------------------------|----|-------------------|--------------------|-----------|
| AKXD-27 | 8557  | +/+   | <i>Zfp521</i>        | Transcription factor              | 18 | intron 1          | not disrupt CDS    | same      |
| AKXD-27 | 8756  | ko/ko | <i>Zfp521</i>        | Transcription factor              | 18 | intron 1          | not disrupt CDS    | same      |
| AKXD-27 | 8172  | +/+   | <i>Zfp521</i>        | Transcription factor              | 18 | intron 1          | not disrupt CDS    | same      |
| AKXD-27 | 6686  | +/+   | <i>Zfp521</i>        | Transcription factor              | 18 | intron 1          | not disrupt CDS    | same      |
| AKXD-27 | 8563  | +/+   | <i>Zfp521</i>        | Transcription factor              | 18 | intron 1          | not disrupt CDS    | same      |
| AKXD-27 | 8643  | +/+   | <i>Zfp521</i>        | Transcription factor              | 18 | intron 1          | not disrupt CDS    | same      |
| AKXD-27 | 6996  | +/+   | <i>Zfp521</i>        | Transcription factor              | 18 | intron 1          | not disrupt CDS    | same      |
| AKXD-27 | 7420  | +/+   | <i>Zfp608</i>        | Zinc finger protein               | 18 | 3 prime           | 50.244kb           | same      |
| AKXD-27 | 8557  | +/+   | <i>Zfp608</i>        | Zinc finger protein               | 18 | 3 prime           | 50.244kb           | same      |
| AKXD-27 | 7251  | +/+   | <b>March3</b>        | Undefined                         | 18 | 5 prime           | 50.153kb           | inv       |
| AKXD-27 | 7070  | ko/ko | <b>March3</b>        | Undefined                         | 18 | 5 prime           | 54.847kb           | inv       |
| AKXD-10 | 11680 | ko/ko | <b>Mppe1</b>         | metallo phosphoesterase           | 18 | intron 1          | not disrupt CDS    | inv       |
| AKXD-14 | 3053  | +/+   | <b>Mppe1</b>         | metallo phosphoesterase           | 18 | 5 prime           | 0.228kb            | same      |
| AKXD-14 | 3195  | +/+   | <i>Nfatc1</i>        | Transcriptional regulation        | 18 | intron 9          | disrupt CDS        | same      |
| AKXD-27 | 6648  | ko/ko | <i>Nfatc1</i>        | Transcriptional regulation        | 18 | intron 9          | disrupt CDS        | same      |
| AKXD-27 | 6899  | ko/ko | <i>Nfatc1</i>        | Transcriptional regulation        | 18 | intron 8          | disrupt CDS        | inv       |
| AKXD-27 | 7232  | ko/ko | <b>Scyl1</b>         | Kinase-like protein               | 19 | 5 prime           | 31.576kb           | same      |
| AKXD-27 | 8758  | ko/ko | <b>Scyl1</b>         | Kinase-like protein               | 19 | 5 prime           | 31.904kb           | same      |
| AKXD-10 | 11427 | ko/ko | <b>Scyl1</b>         | Kinase-like protein               | 19 | 5 prime           | 32.724kb           | inv       |
| AKXD-10 | 11984 | ko/ko | <b>Ppp1r14b</b>      | Protein phosphatase, regulatory   | 19 | intron 1          | disrupt CDS        | same      |
| AKXD-14 | 3204  | +/+   | <b>Ppp1r14b</b>      | Protein phosphatase, regulatory   | 19 | intron 1          | disrupt CDS        | same      |
| AKXD-10 | 12169 | ko/ko | <b>Tnfrsf6</b>       | Tnf receptor superfamily          | 19 | intron 1          | disrupt CDS        | same      |
| AKXD-27 | 6634  | ko/ko | <b>Tnfrsf6</b>       | Tnf receptor superfamily          | 19 | intron 1          | disrupt CDS        | same      |
| AKXD-14 | 3134  | ko/ko | <i>Hhex</i>          | Homeodomain protein               | 19 | 5 prime           | 1.476kb            | inv       |
| AKXD-10 | 11767 | +/+   | <i>Hhex</i>          | Homeodomain protein               | 19 | 5 prime           | 0.642kb            | inv       |
| AKXD-10 | 11985 | ko/ko | <i>Hhex</i>          | Homeodomain protein               | 19 | 5 prime           | 0.274kb            | inv       |
| AKXD-27 | 7233  | +/+   | <i>Hhex</i>          | Homeodomain protein               | 19 | exon 1            | disrupt CDS        | inv       |
| AKXD-27 | 6645  | +/+   | <i>Hhex</i>          | Homeodomain protein               | 19 | 3 prime           | 26.305kb           | same      |
| AKXD-14 | 3116  | ko/ko | <i>Hhex</i>          | Homeodomain protein               | 19 | 3 prime           | 30.414kb           | same      |
| AKXD-10 | 11419 | +/+   | <i>Hhex</i>          | Homeodomain protein               | 19 | 3 prime           | 51.636kb           | same      |
| AKXD-14 | 3029  | ko/ko | <i>Hhex</i>          | Homeodomain protein               | 19 | 3 prime           | 52.579kb           | inv       |
| AKXD-10 | 11402 | +/+   | <i>Hhex</i>          | Homeodomain protein               | 19 | 3 prime           | 52.891kb           | same      |
| AKXD-14 | 3376  | +/+   | <i>Hhex</i>          | Homeodomain protein               | 19 | 3 prime           | 53.859kb           | same      |
| AKXD-10 | 12175 | ko/ko | <i>Hhex</i>          | Homeodomain protein               | 19 | 3 prime           | 53.864kb           | same      |
| AKXD-14 | 3046  | ko/ko | <i>Hhex</i>          | Homeodomain protein               | 19 | 3 prime           | 53.943kb           | same      |
| AKXD-14 | 3381  | ko/ko | <i>Hhex</i>          | Homeodomain protein               | 19 | 3 prime           | 53.967kb           | same      |
| AKXD-14 | 3200  | +/+   | <i>Hhex</i>          | Homeodomain protein               | 19 | 3 prime           | 53.969kb           | same      |
| AKXD-10 | 11748 | ko/ko | <i>Hhex</i>          | Homeodomain protein               | 19 | 3 prime           | 54.098kb           | same      |
| AKXD-14 | 3037  | ko/ko | <i>Hhex</i>          | Homeodomain protein               | 19 | 3 prime           | 54.181kb           | same      |
| AKXD-10 | 11979 | ko/ko | <i>Hhex</i>          | Homeodomain protein               | 19 | 3 prime           | 54.198kb           | same      |
| AKXD-10 | 11977 | +/+   | <i>Hhex</i>          | Homeodomain protein               | 19 | 3 prime           | 54.254kb           | same      |
| AKXD-14 | 3159  | +/+   | <i>Hhex</i>          | Homeodomain protein               | 19 | 3 prime           | 54.373kb           | same      |
| AKXD-10 | 11673 | ko/ko | <i>Hhex</i>          | Homeodomain protein               | 19 | 3 prime           | 54.449kb           | same      |
| AKXD-14 | 4301  | ko/ko | <i>Hhex</i>          | Homeodomain protein               | 19 | 3 prime           | 54.543 kb          | same      |
| AKXD-10 | 14043 | ko/ko | <b>Avp1</b>          | MAPK activation                   | 19 | 5 prime           | 0.682kb            | same      |
| AKXD-27 | 6644  | +/+   | <b>Avp1</b>          | MAPK activation                   | 19 | 5 prime           | 0.877kb            | inv       |
| AKXD-10 | 14150 | ko/ko | <b>Ldb1</b>          | Transcription cofactor            | 19 | 5 prime           | 0.272kb            | inv       |
| AKXD-27 | 8444  | +/+   | <b>Ldb1</b>          | Transcription cofactor            | 19 | 5 prime           | 2.759kb            | same      |
| AKXD-14 | 3371  | +/+   | <b>Hdac6   Eras</b>  | Histone deacetylase   RAS protein | X  | 5 prime   5 prime | 18.804kb   0.167kb | inv   inv |
| AKXD-27 | 8888  | +/+   | <b>Hdac6   Eras</b>  | Histone deacetylase   RAS protein | X  | 5 prime   5 prime | 18.931kb   0.294kb | inv   inv |
| AKXD-27 | 7390  | ko/ko | <i>Bcor</i>          | Transcription factor              | X  | 5 prime           | 3.252kb            | same      |
| AKXD-27 | 8160  | +/+   | <i>Bcor</i>          | Transcription factor              | X  | 5 prime           | 6.096kb            | inv       |
| AKXD-10 | 13844 | ko/ko | <i>Bcor</i>          | Transcription factor              | X  | 5 prime           | 48.318kb           | same      |
| AKXD-14 | 5039  | ko/ko | <i>Gpc3</i>          | Negative growth regulator         | X  | 5 prime           | 131.236kb          | inv       |
| AKXD-14 | 3196  | +/+   | <i>Gpc3</i>          | Negative growth regulator         | X  | 5 prime           | 131.585kb          | inv       |
| AKXD-14 | 4153  | +/+   | <i>Gpc3</i>          | Negative growth regulator         | X  | 5 prime           | 137.99kb           | inv       |
| AKXD-10 | 11977 | +/+   | <b>Arhgap4 Ard1</b>  | Rho GTPase N-acetyltransferase    | X  | 5 prime   3 prime | 1.11kb   4.535kb   | inv   inv |
| AKXD-27 | 6996  | +/+   | <b>Arhgap4 Ard1</b>  | Rho GTPase N-acetyltransferase    | X  | 5 prime   3 prime | 2.775kb   2.87kb   | inv   inv |
| AKXD-27 | 7403  | +/+   | <b>4921526G09Rik</b> | Undefined                         | X  | 5 prime           | 57.36kb            | same      |
| AKXD-10 | 11591 | ko/ko | <b>4921526G09Rik</b> | Undefined                         | X  | 5 prime           | 57.192kb           | inv       |
| AKXD-27 | 8415  | ko/ko | <b>Pola1</b>         | DNA polymerase                    | X  | 5 prime           | 6.412kb            | inv       |
| AKXD-10 | 13847 | ko/ko | <b>Pola1</b>         | DNA polymerase                    | X  | 5 prime           | 6.726kb            | same      |
| AKXD-10 | 13831 | +/+   | <b>Pola1</b>         | DNA polymerase                    | X  | 5 prime           | 6.726kb            | same      |
| AKXD-10 | 13843 | ko/ko | <b>Pola1</b>         | DNA polymerase                    | X  | 5 prime           | 6.726kb            | same      |
| AKXD-27 | 7065  | +/+   | <i>Il2rg</i>         | Cytokine receptor                 | X  | 5 prime           | 5.455kb            | same      |
| AKXD-27 | 7107  | ko/ko | <i>Il2rg</i>         | Cytokine receptor                 | X  | 5 prime           | 6.759kb            | inv       |

CIS loci listed in bold are new candidate cancer causing genes identified in the present study, while CIS listed in non-bold have been identified in previous insertional mutagenesis screens. All of the data contained in Supplementary Table 1 has been deposited in the Mouse Retroviral Tagged Cancer Gene Database (<http://rtcgd.ncicrf.gov>).



**Supplementary Figure S1** Southern analysis of retroviral integrations in tumors of AKXD- *Blm*<sup>m3/m3</sup> mice. High-molecular weight genomic DNAs were extracted from the brain (B) and tumor (T) of each animal. Tumor ID numbers are shown at the top of each gel. A tumor that does not have a viral integration at that locus was used as a control. Restriction enzyme-digested DNAs (5 µg per lane) were electrophoresed in 0.8% agarose gels and transferred to nylon membranes followed by UV cross-linking. Probes were labeled with alkaline phosphatase and the bands detected with CDP-Star reagents. Wt arrows denote bands produced from the wild type allele and m arrows denote mutant bands indicative of the retroviral-mutated allele. Among the CIS genes whose coding regions were consistently disrupted by viral integration, some of the genes (A) showed evidence of bi-allelic integration, but others (B) did not.

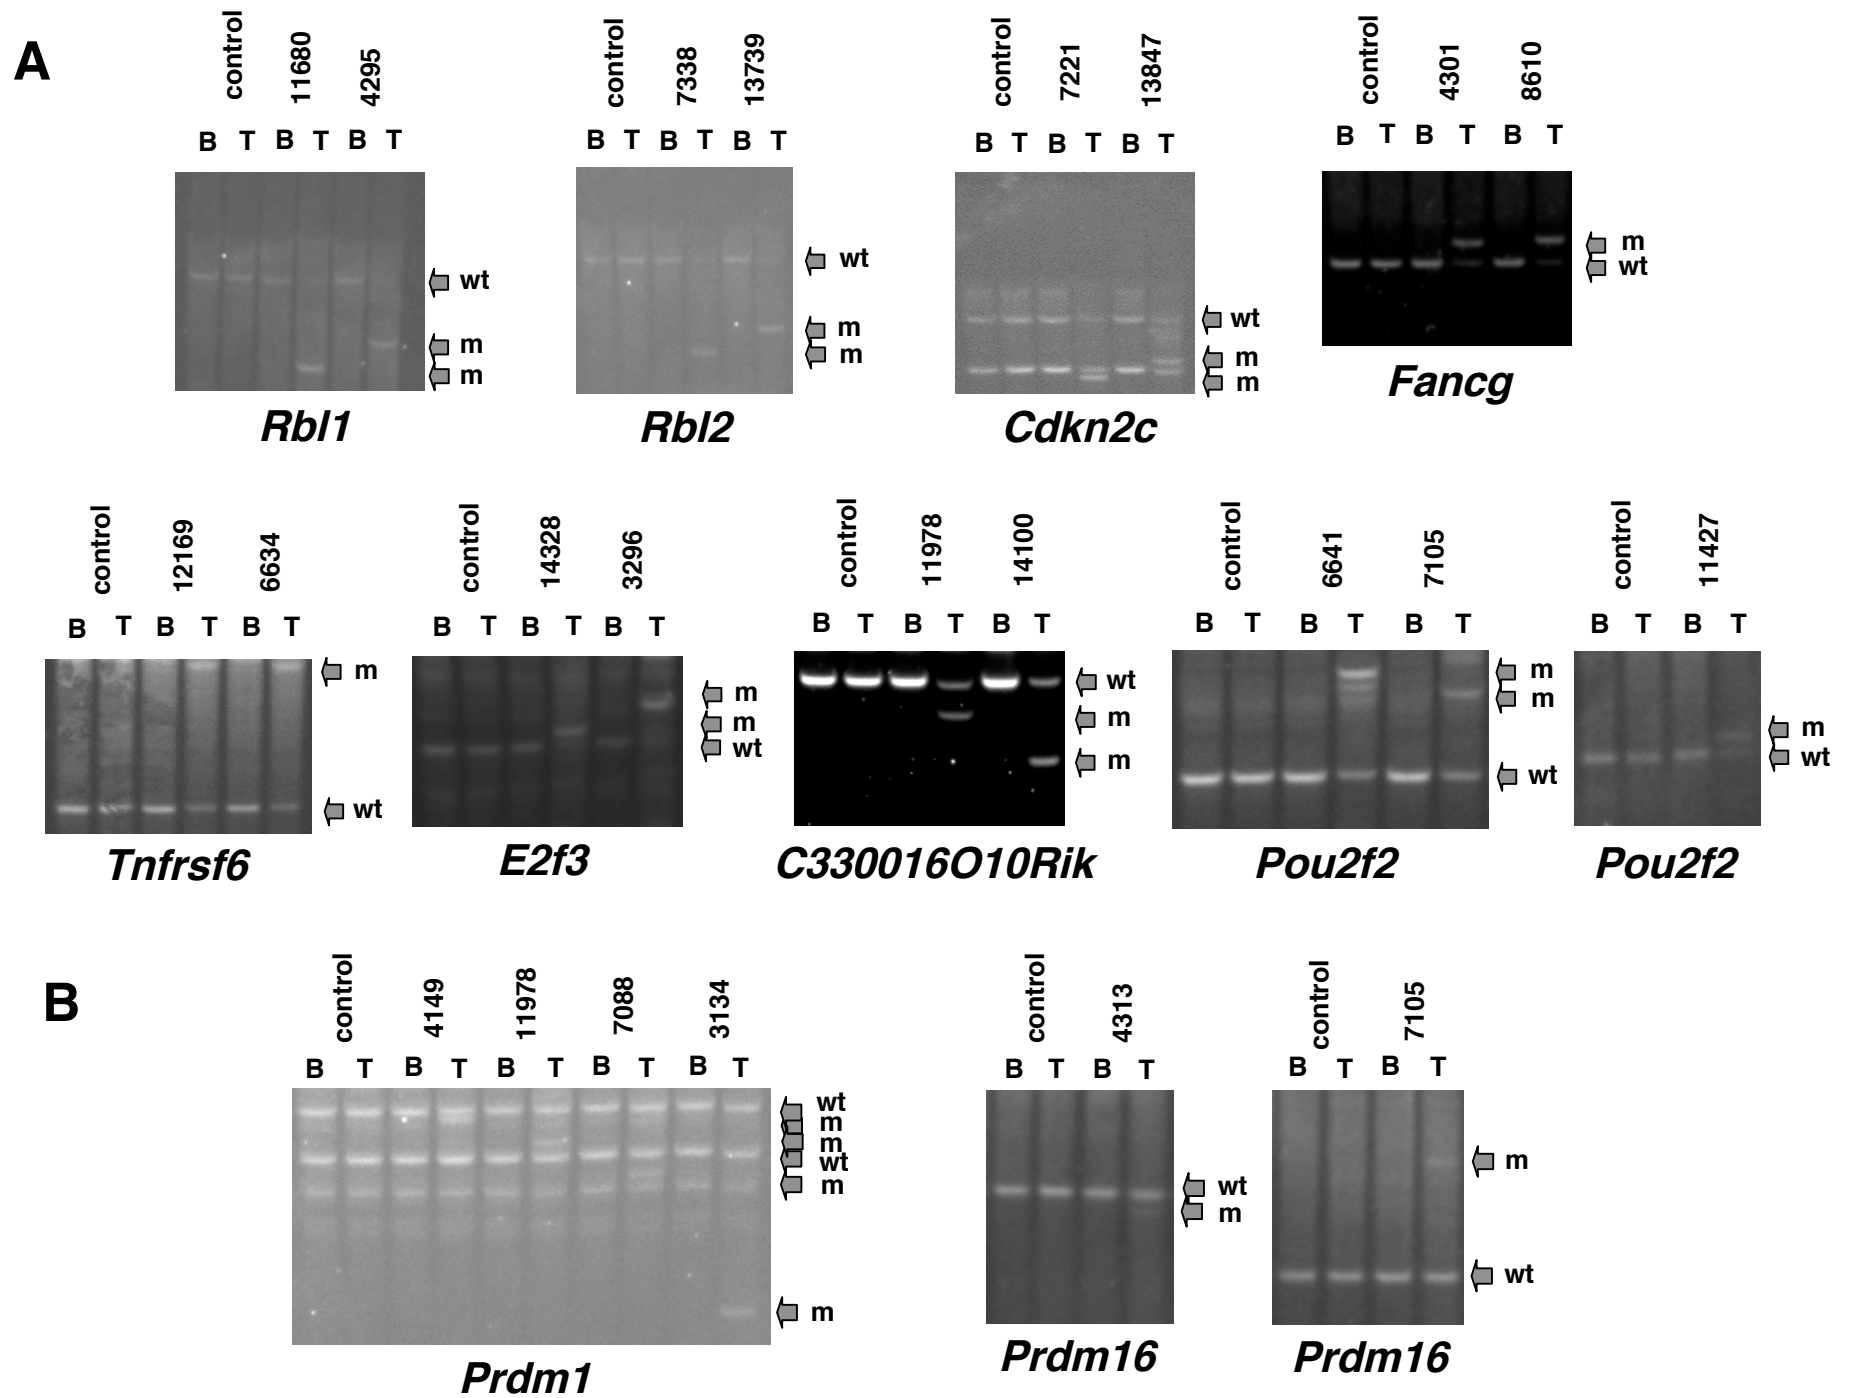

**Supplementary Figure S2** Southern analysis of retroviral integrations in tumors of AKXD- *Blm*<sup>m3/m3</sup> mice. Southern blots were performed as described in the legend of supplementary figure S1. Wt arrows denote bands produced from the wild type allele and m arrows denote mutant bands indicative of the retroviral-mutated allele. (A) Bi-allelic integration was also detected in some CIS genes whose expressions were downregulated by viral integration in AKXD- *Blm*<sup>m3/m3</sup> lymphomas, (B) but was not detected in CIS genes whose expressions may be upregulated by viral integration in AKXD-*Blm*<sup>+/+</sup> lymphomas.

**A**

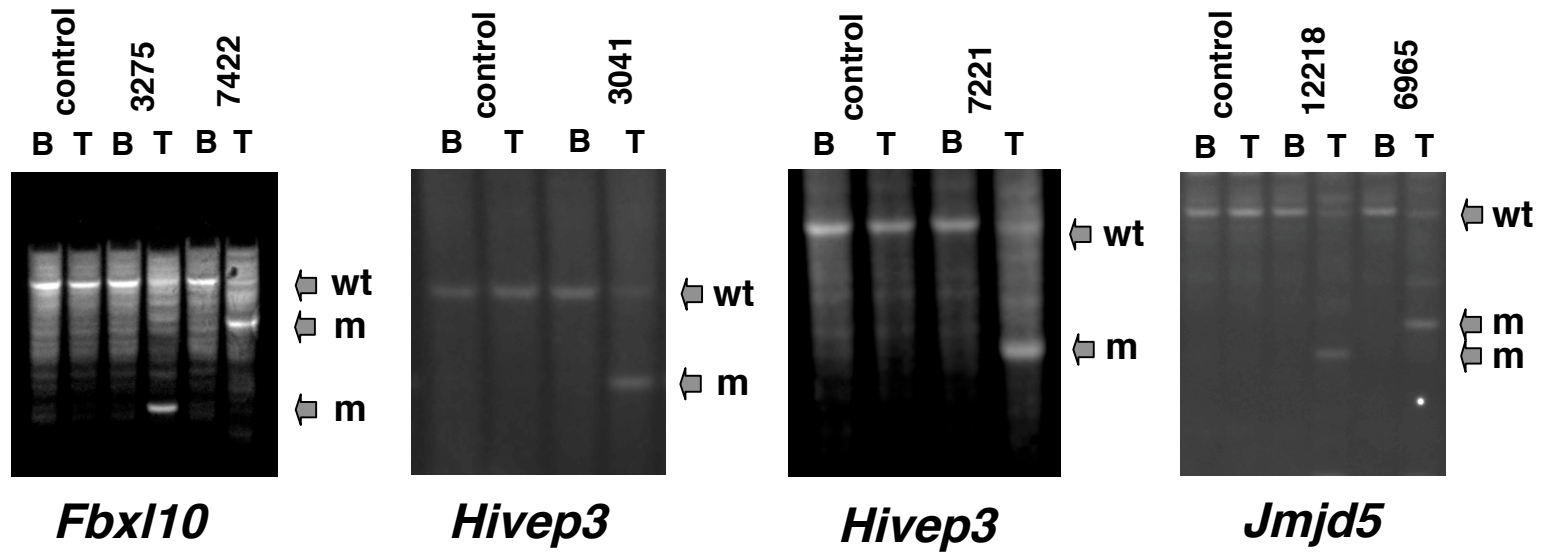

**B**

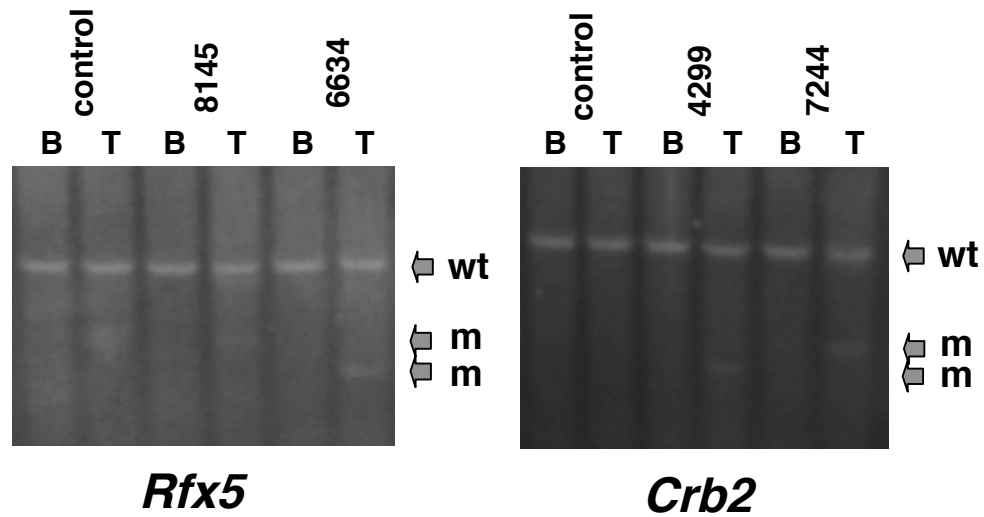

**Supplementary Figure S3** Expressions of TS candidate genes were downregulated in lymphomas. (A) Expression of candidate TS genes in AKXD- *Blm*<sup>m3/m3</sup> lymphomas. Total RNAs from the lymphomas were fractionated on 1.0% agarose-formaldehyde gels and transferred onto nylon membranes. Tumor ID numbers are shown at the top of each gel. A similar type of tumor that does not have a viral integration at that locus was used as a control. (B) Quantitative analysis of Northern blots. Gel images were acquired using a luminescent image analyzer and band intensities quantified with the Image Gauge ver.4 software. Arbitrary units were shown on vertical axis regarding the expression level of control cells as 1.

**A**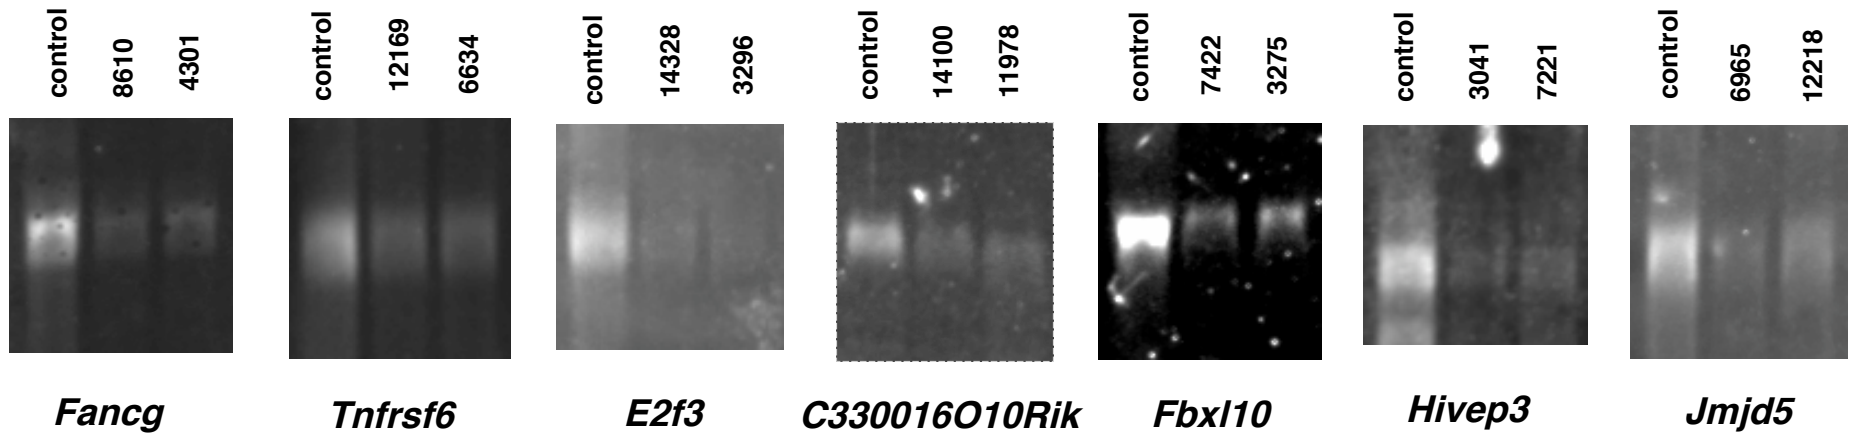**B**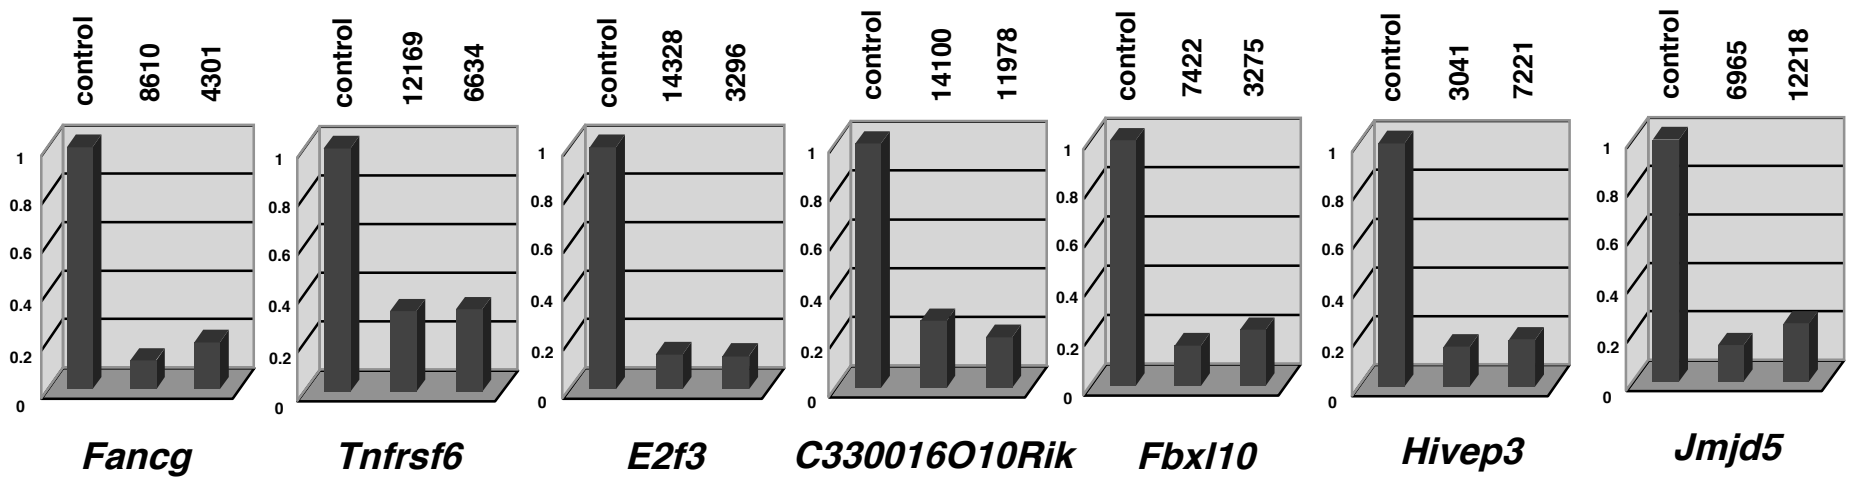

**Supplementary Figure S4** Expression of *Jmjd5* and *Fbxl10* was suppressed by small hairpin RNAs (shRNAs) for each gene. Six retroviral vectors expressing shRNAs for each gene were constructed and introduced into NIH 3T3 cells. Infected cells were then selected for their puromycin resistance for two weeks and the expression levels of each gene examined using Northern blots. Two shRNA constructs that suppressed each gene were chosen for subsequent studies so that off-target effects of the shRNAs could be avoided.

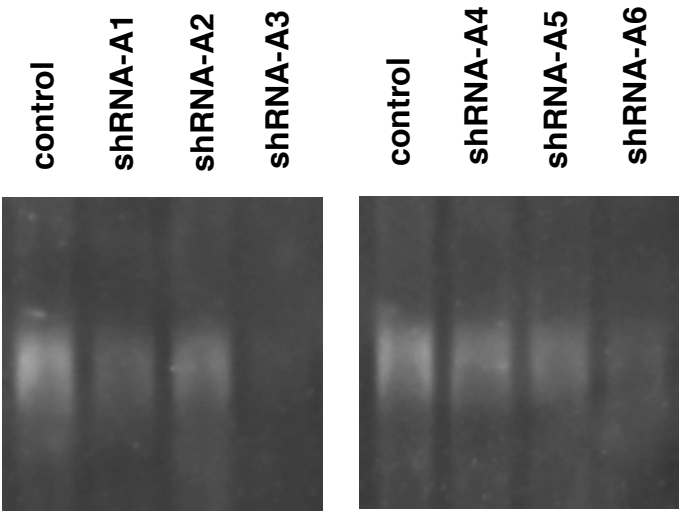

***Jmjd5***

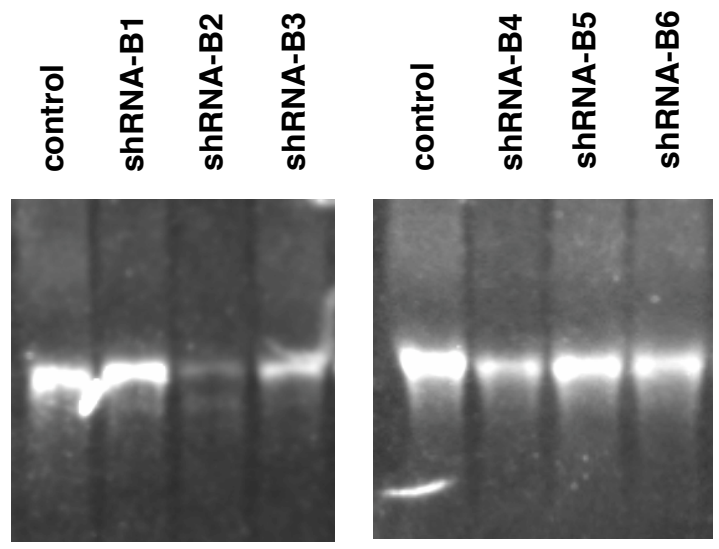

***Fbxl10***
